## **Disentangling the lipid divide: Identification of key enzymes**

### **for the biosynthesis of unusual Membrane-spanning and Ether lipids in Bacteria**

Diana X. Sahonero-Canavesi<sup>1\*</sup>, Melvin Siliakus<sup>1</sup>, Alejandro Abdala Asbun<sup>1</sup>, Michel Koenen<sup>1</sup>, F. A. Bastiaan von Meijenfeldt<sup>1</sup>, Sjef Boeren<sup>2</sup>, Nicole J. Bale<sup>1</sup>, Julia C. Engelman<sup>1</sup>, Kerstin Fiege<sup>1</sup>, Lora Strack van Schijndel<sup>1</sup>, Jaap S. Sinninghe Damsté<sup>1,3</sup> and Laura Villanueva<sup>1,3</sup>

<sup>1</sup>Department of Marine Microbiology and Biogeochemistry (MMB), NIOZ Royal Netherlands Institute for Sea Research, PO Box 59, 1790 AB Den Burg, The Netherlands

<sup>2</sup>Laboratory of Biochemistry, Wageningen University & Research, Stippeneng 4, 6708 WE, Wageningen, The Netherlands

<sup>3</sup>Utrecht University, Faculty of Geosciences, Department of Earth Sciences, PO Box 80.021, 3508 TA Utrecht, The Netherlands

**Keywords:** Membrane-spanning lipids, ether lipids, branched glycerol dialkyl glycerol tetraethers branched GDGT (brGDGT), membrane lipids, *Thermotoga*, *Thermoanaerobacter*, lipid divide, paleotemperature

**Running title:** Bacterial membrane-spanning (ether) lipid biosynthesis

**\*Corresponding author:** Diana X. Sahonero-Canavesi. Email: [diana.sahonero@nioz.nl](mailto:diana.sahonero@nioz.nl)

1 **Bacterial membranes are composed of fatty acids (FAs) ester-linked to glycerol-3-**  
2 **phosphate, while archaea possess membranes made of isoprenoid chains ether-linked to**  
3 **glycerol-1-phosphate. Many archaeal species organize their membrane as a monolayer of**  
4 **membrane-spanning lipids (MSLs). Exceptions to this ‘lipid divide’ are the production by**  
5 **some bacterial species of (ether-bound) MSLs, formed by tail-tail condensation of fatty**  
6 **acids resulting in the formation of (*iso*) diabolic acids (DAs), which are the likely**  
7 **precursors of paleoclimatological relevant branched glycerol dialkyl glycerol tetraether**  
8 **molecules. However, the enzymes responsible for their production are unknown. Here, we**  
9 **report the discovery of bacterial enzymes responsible for the condensation reaction of**  
10 **fatty acids and for ether bond formation, and confirm that the building blocks of *iso*-DA**  
11 **are branched *iso*-FAs. Phylogenomic analyses of the key biosynthetic genes reveal a much**  
12 **wider diversity of potential MSL (ether)-producing bacteria than previously thought, with**  
13 **significant implications for our understanding of the evolution of lipid membranes.**

14

15

16

17

18

19

20

21

22

23

24 Cells are separated from the surrounding environment by a cytoplasmic membrane composed  
25 of lipids and proteins. The typical bacterial lipid membrane consists of fatty acids bound to a  
26 glycerol-3-phosphate backbone (G3P) via ester linkages, organized in a bilayer structure.  
27 Strikingly, however, some bacterial groups organize their membranes in a monolayer of  
28 membrane-spanning lipids (MSL) formed by long-chain dicarboxylic acids that are linked to  
29 G3P through ester and, sometimes, ether bonds. Both MSL and ether bonds have been  
30 considered archetypical archaeal membrane features. Known bacterial MSLs are constituted by  
31 diabolic acids (DAs) and *iso*-diabolic acids (*iso*-DAs) (Fig. 1a, Supplementary Fig. 1). DAs  
32 have been encountered in members of the phyla Thermotogae and Firmicutes of the Clostridia  
33 class<sup>1-4</sup>. *Iso*-DAs occur in members of the genus *Thermoanaerobacter* (phylum Firmicutes,  
34 Clostridia class)<sup>5</sup>, as well as in species of the subdivisions (SDs) 1, 3, 4 and 6 of the phylum  
35 Acidobacteria<sup>6,7</sup>. DAs have been shown to be biosynthesized by tail-to-tail condensation of two  
36 C<sub>16:0</sub> fatty acids (FAs) at the  $\omega$ -1 positions<sup>8</sup>. In the same way, *iso*-DAs are believed to be  
37 produced by the condensation of two *iso*-C<sub>15:0</sub> FAs at the  $\omega$  positions<sup>1</sup>, but the enzymes  
38 responsible for the formation of these types of bacterial MSLs (i.e., MSL synthases) remain  
39 elusive. A recent study has identified a radical SAM enzyme (tetraether synthase, Tes)  
40 responsible for the archaeal tail-to-tail coupling of two ether-bound phytanyl chains, enabling  
41 the synthesis of glycerol dialkyl glycerol tetraethers (GDGTs)<sup>9</sup>. Since Tes homologs were  
42 detected in bacterial genomes, they have been hypothesized to be involved in the synthesis of  
43 bacterial MSLs<sup>9</sup>. However, no Tes homologs were detected in genomes of the Thermotogae  
44 known to be MSL-producers<sup>9</sup>, which suggests another enzyme is involved in the synthesis of  
45 bacterial MSLs.

46 Ether-bonded membrane lipids are also a typical archaeal feature. Nevertheless, they have been  
47 found in some bacteria, sometimes together with MSLs (in Thermotogae and several  
48 Acidobacteria SDs). Non-isoprenoid alkyl glycerol ether lipids have been found in

49 (hyper)thermophilic species of the bacterial phylum Thermotogae<sup>4</sup> in aerobic and facultative  
50 anaerobic mesophilic bacteria of the Acidobacteria SD1 and 4<sup>6,7</sup>, in *Aquifex pyrophilus*<sup>10</sup>, in  
51 *Ammonifex degensii* (Firmicutes Clostridia<sup>11</sup>), in some *Planctomycetes*<sup>12</sup> and in some sulfate-  
52 reducing bacteria<sup>13,14</sup>. In addition, alkenyl (1-alk-1'-enyl, vinyl) glycerol ether lipids or so-  
53 called plasmalogens have been detected in non-thermophilic bacteria and suggested to play a  
54 role in cell resistance against environmental stresses<sup>15-16</sup>. Enzymes involved in bacterial ether  
55 lipid biosynthesis have been discovered in select taxa. In myxobacteria, two independent  
56 pathways contributing to the biosynthesis of ether lipids have been identified; the gene product  
57 of Mxan\_1676 coding for an alkylglycerone-phosphate synthase (*agps* gene) and the *elbB-elbE*  
58 gene cluster<sup>17</sup>, which has also been detected in SD4 Acidobacteria<sup>7</sup>. A gene encoding a  
59 plasmalogen synthase (*plsA*) has been identified in anaerobic bacteria<sup>18</sup>. A modified form of  
60 *plsA* has been detected in *Thermotoga maritima* and in other bacteria producing ether-derived  
61 lipids<sup>19</sup> and proposed to be involved in the conversion of bacterial ester bonds into ether bonds  
62 generating saturated alkyl ethers.

63 The reason why bacteria synthesize membrane-spanning and ether lipids, and how these  
64 features were acquired, remains poorly understood, but it has been speculated that both the  
65 presence of ether bonds and a membrane organization based on a monolayer of MSLs confer  
66 membrane stability<sup>20,21</sup>, as shown for archaeal GDGTs<sup>22</sup>. Determination of how bacterial ether  
67 lipids and MSLs are synthesized is important to better understand how the divergence of lipid  
68 membranes, or the 'lipid divide', proceeded in all life forms. In addition, *iso*-DAs are thought  
69 to be the main precursors of the branched GDGTs (brGDGTs<sup>23</sup>) (Supplementary Fig. 1), which  
70 occur widespread in the environment and are widely used for paleoclimatological  
71 reconstructions<sup>24</sup>. However, their biological producers remain unclear. Determining the  
72 biosynthetic pathway of bacterial (ether) MSL synthesis will allow for the detection of this  
73 capacity in other microbial groups.

74 Here, we identified and confirmed the activity of an MSL synthase in bacteria. In addition, we  
75 confirm the enzymatic activity of a plasmalogen synthase homolog that is involved in the  
76 formation of ether bonds in bacterial alkyl glycerol lipids. Based on phylogenetic analyses of  
77 these enzymes, we identified microbial groups that have the potential to generate these  
78 membrane components and how this feature was acquired, with evolutionary implications for  
79 understanding the acquisition of membrane lipids in all life forms.

### 80 ***Iso-diabolic acid is produced via condensation of iso-fatty acids***

81 The biosynthesis of the MSL *iso*-DA is thought to proceed through the coupling of the tails of  
82 *iso*-branched FAs precursors<sup>1</sup> (Fig. 1a). Since growth temperature affects membrane stability,  
83 and therefore changes in the proportion of MSL are expected, we performed culturing  
84 experiments with the *iso*-DA producer *Thermoanaerobacter ethanolicus* under different growth  
85 regimes and measured its lipids. The relative abundance of the dominant *iso*-C<sub>15:0</sub> FA decreased  
86 simultaneously with a marked increase in the C<sub>30</sub> *iso*-DA during growth at optimal 60°C  
87 temperature (Fig. 1b). A similar observation was made at suboptimal (45°C) temperature, albeit  
88 the maximum abundance of the C<sub>30</sub> *iso*-DA remained lower (14 vs. 24% of total core lipids;  
89 Supplementary Table 1). The higher relative abundance of *iso*-C<sub>30</sub> DA during the stationary  
90 phase at optimal vs. suboptimal growth temperature suggests that *iso*-DA production is  
91 regulated by temperature. This is in agreement with an increased production of GDGTs in  
92 archaea at higher temperatures<sup>25</sup>. These results moreover strongly suggested the formation of  
93 the C<sub>30</sub> *iso*-DA proceeds through a coupling of two *iso*-C<sub>15:0</sub> FAs. To confirm this substrate-  
94 product relationship, we performed incubations with *T. ethanolicus* with a labeled branched  
95 amino acid, <sup>13</sup>C-leucine, required for the synthesis of 3-methylbutyryl-CoA, a key building  
96 block of *iso*-C<sub>15:0</sub> FA<sup>26</sup>. Label incorporation was detected in *iso*-C<sub>15:0</sub> FA but not in C<sub>30:0</sub> *iso*-  
97 DA 20 min after the addition of <sup>13</sup>C-leucine, whereas after prolonged incubation (90 min) the

98 label was also incorporated into the C<sub>30</sub> *iso*-DA (Fig. 1c, Supplementary Table 2). These results  
99 confirm that *iso*-C<sub>15:0</sub> FA acts as the precursor for C<sub>30</sub> *iso*-DA.

100 **In search for potential proteins for the biosynthesis of membrane-spanning and ether**  
101 **lipids in bacteria.**

102 Our results with *T. ethanolicus* indicate that the biosynthetic reaction leading to *iso*-DA is  
103 growth phase-dependent (Fig. 1, Supplementary Figure 2, Supplementary Table 3), as recently  
104 also shown for the formation of the MSL DA in *T. maritima*<sup>19</sup> (Fig. 1b, supplementary Table  
105 3, REF<sup>19</sup>). In both *T. ethanolicus* and *T. maritima*, the percentage of MSLs substantially  
106 increased during the stationary phase of growth, suggesting that experimental conditions allow  
107 for the detection of the activation of the genes coding for the proteins involved in the synthesis  
108 of MSLs. To test this, we analyzed the transcriptomic and proteomic response of these two  
109 bacterial species and compared them between different growth phases and at optimal and  
110 suboptimal growth temperatures (Supplementary Tables 4-14, Supplementary Figures 3-8.  
111 Supplementary Information). Supporting the usability of this approach, the gene encoding the  
112 modified-*plsA* (Tmari\_0479), suspected to be an alkyl ether lipid synthase based on protein  
113 homology<sup>19</sup>, was indeed found to be upregulated at a variety of conditions, coinciding with  
114 higher proportion of alkyl ether lipids (Supplementary Table 14, Supplementary Figure 8). This  
115 is fully in line with its presumed role in the production of ether lipids.

116 We also searched for potential genes encoding MSL synthases. The anticipated biochemical  
117 mechanism for MSL synthesis is based on the dimerization of the FA building blocks through  
118 the formation of a carbon-carbon bond between either the  $\omega$ -1 carbon of C<sub>16</sub> FAs or the  $\omega$   
119 carbon of *iso*-C<sub>15:0</sub> FAs to form DA or *iso*-DA, respectively<sup>8,1</sup>. A radical reaction mechanism  
120 for the formation of MSLs in bacteria has been previously proposed<sup>27</sup>, and recently confirmed  
121 for the synthesis of the isoprenoid MSLs in Archaea<sup>9</sup>. This reaction would involve a radical  
122 intermediate formed by a hydrogen extraction at the tail of one of the fatty acids, followed by

123 a condensation with the other tail, involving the loss of another hydrogen, resulting in the  
124 formation of a C-C bond in the absence of an activated intermediate. Such unique reactions are  
125 commonly catalyzed by radical proteins, a group that shares an unusual Fe-S cluster associated  
126 with the generation of a free radical by the reduction of S-adenosylmethionine (SAM)<sup>28</sup>. Based  
127 on these considerations, we defined selection criteria for the detection of potential MSL  
128 synthases in the pool of genes found to be activated either in the *T. maritima* transcriptome or  
129 proteome, or in the *T. ethanolicus* transcriptome, but not attributed to any known metabolic  
130 pathway. These criteria were that the gene or protein (1) should code for a radical-SAM protein  
131 that contained the cysteine-rich motif; (CxxxCxxC) normally found in the active site of radical  
132 enzymes (2) should encode for an oxidoreductase utilizing an [Fe4 4S] cluster, which can act  
133 on CH or CH<sub>2</sub> groups, (3) should encode a membrane-bound protein, as most of the proteins  
134 known to be involved in the formation of core membrane lipids are membrane-associated, and  
135 (4) should be homologous to proteins in other MSL producing bacteria (Supplementary Figure  
136 9, 10, Supplementary Tables 15-19, Supplementary Information for details). This resulted in a  
137 list of genes encoding potential MSL synthases (Supplementary Tables 16, 17). Additionally,  
138 we performed homology searches (protein blast) using the confirmed Tes homolog of the  
139 archaeon *Methanococcus aeolicus* (Maeo\_0574, ABR56159.1) as query, and a homolog was  
140 detected in the genome of *T. ethanolicus* (EGD50779, e-value  $1e^{-72}$  and 24% identity), which  
141 was also included in our list of potential bacterial MSL synthases (Supplementary Table 16).  
142 Again, no Tes homologs were detected in the genome of *T. maritima*.

### 143 **Confirmation of the activity of the potential MSL synthases and ether-lipid forming** 144 **enzyme**

145 To test the activity of the upregulated radical proteins selected as potential MSL synthases in  
146 *T. maritima* and in *T. ethanolicus*, the genes were cloned in an inducible expression vector and  
147 expressed in *E. coli* BL21 DE3. This *E. coli* strain produces phosphatidylglycerol (PG) intact

148 polar lipids (IPLs)<sup>29</sup>, thought to be the required building blocks for the MSL synthase of *T.*  
149 *maritima*<sup>19</sup>. This *E. coli* strain does not produce the *iso*-FA building blocks for *iso*-DA but has  
150 *n*-C<sub>16:0</sub>, *n*-C<sub>18:1</sub>, and the cyclopropyl FAs cy-C<sub>17:0</sub> and cy-C<sub>19:0</sub> as the most abundant FAs. In  
151 contrast to earlier suggestions of the involvement of archaeal Tes homologs in the formation of  
152 bacterial MSL<sup>9</sup>, the heterologous gene expression of the identified Tes homolog of *T.*  
153 *ethanolicus* did not lead to formation of MSLs under either aerobic or anaerobic conditions.  
154 Yet, our heterologous gene expression experiments led to the confirmation of another radical  
155 SAM protein homologue found in both *T. ethanolicus* and of *T. maritima* genomes (see  
156 Supplementary Table 16-18, 20). This gene (named here *mslS*) encodes an MSL synthase  
157 enabling the coupling of two FAs. Expression of the *mslS* of *T. ethanolicus* led to the formation  
158 of two dicarboxylic acids that were absent in the control experiment (Fig. 2a). Their formation  
159 was only observed when the growth and induction of the expression in *E. coli* was done under  
160 anaerobic conditions. They were identified as C<sub>33</sub> and C<sub>34</sub> diacids containing one and two  
161 cyclopropyl moieties, respectively. Their formation can be envisaged by  $\omega$ - $\omega$  coupling of two  
162 abundant FAs of the *E. coli* strain: an *n*-C<sub>16:0</sub> FA with a cy-C<sub>17:0</sub> FA and two cy-C<sub>17:0</sub> FA,  
163 respectively (Fig. 2c, Supplementary Information, Supplementary Figures 10-11). Other diacids  
164 were also formed in lower relative abundance (Supplementary Figures 12).

165 Similarly, heterologous gene expression of the *mslS* of *T. maritima* in *E. coli* resulted in the  
166 formation of C<sub>32</sub> and C<sub>33</sub> DAs only under anaerobic conditions (Fig. 2b, Supplementary Figure  
167 13). This result confirms that the expression of *T. maritima mslS* gene product catalyzes the  
168 synthesis of C<sub>32</sub> and C<sub>33</sub> DA by joining two C<sub>16</sub> FAs and one C<sub>16</sub> FA with a cy-C<sub>17:0</sub> FA  
169 respectively at the  $\omega$ -1 position (Fig. 2c).

170 Using the same experimental design, we also tested if the expression of the modified *plsA* gene  
171 (Tmari\_0479 in *T. maritima*) led to the formation of ether lipids in aerobic and anaerobic  
172 conditions. Only under anaerobic conditions, the induction of the expression of Tmari\_0479 in



173 *E. coli* led to the detection of a series of 1-alkyl glycerol monoethers, where the alkyl chains  
174 reflected the major FAs present in the *E. coli* host (Fig. 3, Supplementary Figures 14, 15). 1-  
175 Alkyl glycerol monoethers were also detected upon expression in *E. coli* of the modified *plsA*  
176 homolog present in the genome of *Desulfatibacillum alkenivorans* (Fig. 3), a non-plasmalogen,  
177 ether lipid-producing bacterium<sup>14</sup> These experiments confirm the earlier proposed function of  
178 the modified-*plsA* in converting an *sn*-1 ester bond into an *sn*-1 ether bond<sup>19</sup>, and we will further  
179 refer to this enzyme as glycerol ester reductase (GeR). These findings confirm, for the first  
180 time, the enzymatic activity of key enzymes in the production of what are considered to be  
181 unusual bacterial membrane-spanning ether lipids.

## 182 **The widespread occurrence of MSL production in the Domain Bacteria**

183 We screened selected genomes of bacteria with a confirmed presence/absence of DA or *iso*-DA  
184 for the presence of homologs of the confirmed MSL synthase. We performed protein Position-  
185 Specific Iterative (PSI)-BLAST searches, and we considered as homologs those with an e-value  
186  $\leq 1e^{-50}$  and identity  $\geq 30\%$ . These are stringent search criteria as these proteins belong to the  
187 radial SAM family, a large protein family containing many different functions, and less  
188 stringent criteria could lead to matches with homologs not involved in the formation of MSLs.  
189 The 107 bacterial genomes examined include species of the Clostridia class (phylum  
190 Firmicutes), members of the Thermotogales, members of different SDs of the Acidobacteria  
191 phylum, as well as others within the Proteobacteria, Chloroflexi, Verrucomicrobia, FCB  
192 superphylum, Dictyoglomi, PVC group, Aquificae, and Fusobacteria. These were selected  
193 based on their reported membrane lipid composition (presence/absence of MSLs and ether  
194 lipids; Supplementary Table 21). These lipid analyses led, for the first time, to the detection of  
195 DA biosynthetic capability outside of the Thermotogales and Firmicutes Clostridia, in species  
196 within the Dictyoglomi.

197 Homologs of the MSL synthase were detected in all genomes of the DA-producing  
198 Thermotogales and Dictyoglomi phyla, and of the MSL-producing species falling in the  
199 Clostridia class (mostly producing *iso*-DAs, except for *Sarcina ventriculi* and *Butyrivibrio*  
200 *fibrisolvens*, both synthesizing DA) (Supplementary Tables 21-22), once again supporting the  
201 functionality of the proteins. However, in the Clostridia class the presence of an MSL synthase  
202 homolog did not always coincide with confirmed synthesis of MSLs. This suggests that the  
203 MSL synthase homolog is not always functional. Alternatively, since we observe that MSL  
204 formation is regulated by growth and environmental conditions like temperature, limited  
205 experimental setups may have prevented detection of MSLs in these strains. Homologs of Tes  
206 were not detected in the genomes of all DA and *iso*-DA producers known to date  
207 (Supplementary Table 21), indicating that this protein is not responsible for the biosynthesis of  
208 bacterial MSLs in these strains.

209 Besides, no homologs of the MSL synthase were detected in selected genomes of the  
210 Acidobacteria phylum, even though almost all SD 1, 3, 4 and 6 species produce *iso*-DA  
211 (Supplementary Table 21). However, this is not unexpected, as most Acidobacteria are aerobic  
212 or microaerophilic, and only some species are facultative anaerobes<sup>30</sup>; a strictly anaerobic  
213 enzyme such as MSL synthase would therefore likely not be functional. In addition, we only  
214 detected Tes homologues in 3 out of the 14 acidobacterial species known produce *iso*-DA, using  
215 our stringent search criteria (Supplementary Table 21). Hence, an alternative aerobic pathway  
216 used by *iso*-DA producing acidobacteria, which would represent a case of convergent evolution,  
217 thus, remains unconfirmed.

218 An alignment of the MSL synthases of all species with confirmed MSL production with the  
219 confirmed MSL synthase of *T. ethanolicus* revealed six conserved blocks and hydrophobic  
220 regions near their C-terminus when sequences were grouped according to *iso*-DA (Fig. 4a) and  
221 DA producers (Fig. 4b) (Supplementary Figure 16). The novel enzymatic activity leading to the

222 synthesis of MSL either for *iso*-DA or DA consists in joining the alkyl tails of two fatty acids,  
223 meaning that the substrates employed by these enzymes are hydrophobic in nature.

224 Modeling of the 3D-structures of the confirmed MSL synthases of *T. ethanolicus* (Fig. 4c) and  
225 *T. maritima* (Fig. 4d) revealed that the proposed hydrophobic region is localized close to the  
226 three conserved cysteines and the SAM binding region (radical SAM core), suggesting that this  
227 is the reaction center for the coupling of the two hydrophobic tails of the substrates. The key  
228 difference between the two types of MSL synthases (i.e., responsible for either DA and *iso*-DA  
229 production) is the lipid substrate (i.e., non-branched or *iso*-FA, respectively) and the positions  
230 at which the two chains are connected (i.e.,  $\omega$ -1 or  $\omega$ , respectively). The hydrophobic region of  
231 the two groups of MSL synthases likely controls the binding of specific lipid substrates and  
232 allows the hydrogen abstraction at the specific position (Fig. 4c,d, Supplementary Figure 17).  
233 Indeed, as would be expected for an enzyme forming *iso*-DAs (coupling  $\omega$  carbon from *iso*-C<sub>15</sub>  
234 FAs), in our expression experiments with the *T. ethanolicus* MSL synthase, several long-chain  
235 diacids (Fig. 2a, 2c, Supplementary Figure 8) were produced by the  $\omega$ - $\omega$  coupling of two fatty  
236 acids, even though only the non-branched FAs produced by the *E. coli* host strain were available  
237 for the enzymatic reaction. Consistently, the formation of C<sub>32</sub> DA in *E. coli* upon expression of  
238 the MSL synthase from *T. maritima* confirms the expected enzymatic reaction between the  $\omega$ -  
239 1 carbons from C<sub>16</sub> FAs. Moreover, only specific FA combinations resulted in the formation of  
240 diacids with *T. ethanolicus* MSL synthase, suggesting that only the tails of specific fatty acids  
241 could be accommodated in the hydrophobic region to allow the  $\omega$ - $\omega$  coupling. Thus, the *T.*  
242 *ethanolicus* MSL synthase has a well-defined specificity, which is different from the MSL  
243 synthases involved in DA synthesis.

244 We extended the screening of MSL synthase homologs in the NCBI non-redundant protein  
245 sequence database (nr) using stringent search criteria (DIAMOND search with e-value  $\leq 1e^{-50}$   
246 and query coverage  $\geq 30\%$ ), and built a maximum-likelihood phylogenetic tree. Homologs

247 were detected in species of the phyla Firmicutes, Actinobacteria, Thermotogae, Synergistetes,  
248 Spirochaetes, Armatimonadetes, Caldiserica, Calditrichaeota, Coprothermobacterota,  
249 Chloroflexi, Nitrospirae, Elusimicrobia, Deferribacteres, Dictyoglomi, Proteobacteria (gamma  
250 and delta), Atribacterota, FCB superphylum, Cyanobacteria/Melainabacteria group, PVC  
251 group, and in multiple members of the bacteria candidate phyla (see Fig. 5a, Supplementary  
252 File 1). The MSL synthase tree clustering does not follow the grouping based on taxonomy,  
253 suggesting large scale transfers across the bacterial and archaeal domains. MSL synthase  
254 homologs are present in genomes of several classes within the phylum Firmicutes supporting  
255 the acquisition of the *mslS* gene before the diversification of this phylum. MSL synthase  
256 sequences detected in bacteria candidate phyla, FCB superphylum, Spirochaetes, some  
257 Chloroflexi and deltaproteobacteria were closely related, which might suggest they were  
258 acquired by horizontal gene transfer as these groups often coexist in anoxic environments.

### 259 **The widespread occurrence of ether lipid production in the Domain Bacteria**

260 In addition to our MSL synthase search, we screened the genomes of a set of selected strains  
261 rigorously analyzed for the presence of MSL and ether lipids (Supplementary Table 21), for the  
262 presence of homologs of the GeR identified in *T. maritima*. For all of the strains producing  
263 alkyl ether-bond membrane lipids, their genomes also harbored a GeR homolog, with the  
264 exception of the members of the Acidobacteria. The presence of a GeR homolog does not  
265 always lead to confirmed production of alkyl ether lipids in culture (Supplementary Table 21),  
266 suggesting that their synthesis may be regulated by specific physiological factors.

267 The functional domain architecture of the GeR in *T. maritima* is composed of two activation  
268 domains identified by the Pfam domain PF01869 (or B; BcrAD\_BadFG), one reduction domain  
269 PF09989 (or D; DUF2229) followed by four small (*ca.* 50 aa) domains, two reduction (D) and  
270 two dehydration domains PF06050 (or H; HGD-D) (BBDHDDH, Supplementary Figure 18).

271 We analyzed the functional domain architecture of the GeR homologs in strains with confirmed  
272 production of saturated alkyl ethers (Supplementary Table 21).

273 The *T. maritima* GeR, confirmed here to form alkyl ethers, coincides in the three first domains  
274 with that of *E. faecalis* (BBDH) (Supplementary Figure 18, REF<sup>19</sup>), which is known to  
275 synthesize plasmalogens<sup>18</sup>. Other previously screened Thermotogae strains known to  
276 synthesize alkyl ethers, harbor a GeR that also coincides with the two activation and reduction  
277 domains (BBD), but with some variations in the successive domains (Supplementary Figure 18,  
278 Supplementary Table 21). Similarly, the GeR functional domains of *D. alkenivorans*, which  
279 synthesizes alkyl ethers, also possess the activation and reduction domains, but also with some  
280 variations in the architecture with respect to the functional domain localization of the *T.*  
281 *maritima* GeR.

282 We observed that several strains within the Clostridia synthesizing plasmalogens, and in lower  
283 proportion also saturated alkyl ethers, have the same functional domain architecture present in  
284 *Enterococcus faecalis* (BBDH). It is possible that the synthesis of alkyl ethers is a by-product  
285 of the reaction leading to plasmalogens in these cases. All these variations detected along the  
286 GeR structural domains indicate that the two activation and one reduction domains (BBD) are  
287 conserved among the alkyl ether lipid producers as seen in the confirmed GeR enzyme from *T.*  
288 *maritima* and *D. alkenivorans*. GeR homologs were also found with other domain architectures  
289 containing only one activation domain in the protein (B and BDDD; Supplementary Figure 18,  
290 Supplementary Table 21). Since most homologs have two activation domains, it is unclear if a  
291 single activation domain leads to a functional protein. Bacteria that have a GeR homolog with  
292 only one activation domain may then use an alternative pathway for catalyzing ether lipid  
293 formation. Here, we also detected distant homologs of the alkylglycerone-phosphate synthase  
294 (*agps* gene) Mxan\_1676 of *Myxococcus xanthus*, also involved in the biosynthesis of ether  
295 lipids<sup>17</sup> (Lorenzen *et al.*, 2014), in some bacterial genomes (Supplementary Table 21),

296 suggesting that in these organisms more than one biosynthetic pathway for ether lipid  
297 production may be used. Some members of the Acidobacteria SD4 have been seen to harbor  
298 the *elb* gene cluster<sup>7</sup>. Besides, we also detected the GeR homolog in two Acidobacteria genomes  
299 of different subdivisions, *Edaphobacter aggregans* (SD1) and in *Holophaga foetida* (SD8),  
300 both reported to synthesize alkyl ether bonds (Supplementary Table 21). Of all the  
301 Acidobacteria strains known to synthesize ether-bonded lipids, *E. aggregans* and *H. foetida* are  
302 either facultative anaerobes or strict anaerobes. We also detected a GeR homolog in the  
303 anaerobic acidobacterium *Thermotomaculum hydrothermale*, but it has not been reported to  
304 synthesize alkyl ether lipids in culture (Supplementary Table 21) (REF<sup>30</sup> for an overview). The  
305 (facultative) anaerobic metabolism of these acidobacteria would be compatible with the  
306 catalysis of GeR, which it is only functional under anaerobic conditions (REF<sup>18</sup>, this study).  
307 Therefore, we speculate that facultative or strict anaerobic groups within the Acidobacteria  
308 could be producers of ether lipids by using the GeR confirmed in this study. This hypothesis is  
309 further supported by the detection of GeR homologs in Acidobacteria metagenomic assembled  
310 genomes detected in anoxic systems (see Supplementary Information).

311 We also investigated the presence of homologs of GeR of *T. maritima* in the NCBI non-  
312 redundant protein sequence database (nr) using stringent search criteria (DIAMOND search  
313 with e-value  $\leq 1e^{-50}$  and query coverage  $\geq 30\%$ ), and they were detected widely across the  
314 tree of life, in species of the phyla Firmicutes, Actinobacteria, Thermotogae, Synergistetes,  
315 Spirochaetes, Armatimonadetes, Calditrichaeota, Chloroflexi, Nitrospirae, Elusimicrobia,  
316 Deferribacteres, Proteobacteria, Atribacterota, FCB superphylum,  
317 Cyanobacteria/Melainabacteria group, PVC group, Nitrospinaea, Thermodesulfobacteria,  
318 Aquificae, Acidobacteria, Chrysiogenetes, and in multiple members of the bacteria candidate  
319 phyla (Fig. 5b, Supplementary File 2). GeR homologs of Firmicutes are widespread across the  
320 GeR protein tree but often mostly closely related to those of Actinobacteria. In addition,

321 multiple GeR homologs were detected in genomes of deltaproteobacteria, which suggests that  
322 the capacity to make ether-bonded lipids in members of this group is more widespread than  
323 originally thought.

324 Importantly, many taxa contain both MSL synthase and GeR homologs. We conclude that  
325 members of the Firmicutes, Actinobacteria, Thermotogae, Synergistetes, Spirochaetes,  
326 Armatimonadetes, Calditrichaeota, Chloroflexi, Nitrospirae, Elusimicrobia, Deferribacteres,  
327 Proteobacteria, Atribacterota, FCB superphylum, PVC group, and members of several bacteria  
328 candidate phyla are potential producers of bacterial ether MSLs, and therefore potential  
329 producers of brGDGTs in environmental settings.

### 330 **Occurrence of bacterial MSL synthase and GeR in the Domain Archaea**

331 Most Archaea synthesize MSLs based on isoprenoidal alkyl chains (i.e., GDGTs) linked  
332 through ether bonds to G1P instead of the G3P backbone observed in Bacteria. Unlike for  
333 Bacteria, the enzymes involved in the formation of ether bonds in Archaea are known (i.e.,  
334 prenyltransferases<sup>31</sup>) and they are not generally found in Bacteria<sup>32</sup>. The enzyme involved in  
335 the coupling of two phytanyl chains to form archaeal MSLs (i.e., biphytanes) has been recently  
336 confirmed to be a radical SAM protein (the previously mentioned Tes<sup>9</sup>) and hence the  
337 biosynthetic pathway for GDGT production in archaea has been established. The presence of  
338 homologs of the confirmed ‘bacterial type’ MSL synthase in genomes of Archaea would thus  
339 be unexpected. Surprisingly, however, we also detected homologs in (meta)genomes of  
340 members of the DPANN Archaea, and members of the Asgard group (Fig. 5a, Supplementary  
341 File 1, Supplementary Information). These homologs of the bacterial MSL synthase could  
342 potentially be able to connect the tails of two isoprenoid chains since this reaction is  
343 somewhat similar to the one connecting two FAs for the production of bacterial MSLs.  
344 However, the genomes of these archaeal species also harbor homologs of Tes<sup>9</sup>. Furthermore,  
345 the low homology with the confirmed bacterial MSL synthase, and the apparent limited archaeal



346 distribution of the MSL synthase homologs argues against the canonical coupling of isoprenoids  
347 by MSL synthase in archaea. It is possible that the MSL synthase homologs in specific Archaeal  
348 groups catalyzes the coupling of ether or ester bound fatty acids, as seen in this study for  
349 Bacteria. This capacity is enigmatic in Archaea. In the same way that the formation of MSLs in  
350 Bacteria challenges the concept of the ‘lipid divide’, some Archaea have been reported to  
351 produce phospholipid fatty acids<sup>33</sup> (Gattinger *et al.*, 2002), or encode fatty acid biosynthesis  
352 genes and ester-bond forming acid transferases alongside the archaeal lipid biosynthesis gene  
353 machinery in their genomes<sup>34,35</sup>. This trait has been observed in genomes of uncultured archaeal  
354 groups, namely the Euryarchaeota Marine Group II and members of the Asgard  
355 superphylum<sup>32,35</sup>. As the same members of the Asgard superphylum seem to harbor a bacterial  
356 MSL synthase homolog, some members of this superphylum may have the capacity to form  
357 bacterial membrane-spanning phospholipid fatty acid lipid membranes. This hypothesis is  
358 exciting due to the position of Asgard archaea as the closest descendants of the archaeal ancestor  
359 leading to eukaryotes<sup>36</sup>, and its significance for better understanding the acquisition of  
360 membranes in the membrane transition in eukaryogenesis. The detection of homologs of the  
361 MSL synthase in members of the DPANN archaea is also of interest. Their streamlined  
362 genomes very often lack the biosynthetic genes required to synthesize their own membrane  
363 lipids, relying on those of their host<sup>37</sup>. Nevertheless, the presence of the homolog of MSL  
364 synthase could be interpreted as a potential capacity to remodel the lipids of the host or those  
365 potentially acquired from the environment. Further study is required to investigate these  
366 hypotheses and their evolutionary implications.

367 We also encountered homologs of the GeR in genomes of the Euryarchaeota classes  
368 Methanosarcinales and Methanomicrobiales, in the genomes of members of the DPANN  
369 archaea (*Ca.* Woesearchaeota, Pacearchaeota), and some members of the Asgard group (*Ca.*  
370 Lokiarchaeota, including *Candidatus* Prometheoarchaeum syntrophicum<sup>38</sup>, and genomes of the



371 *Ca. Heimdallarchaeota*) (Fig. 5b), for which we have also detected the presence of potential  
372 MSL synthase homologs, giving further support to the possibility that specific Archaea might  
373 possess the genetic ability to synthesize (ether-bonded) bacterial MSLs.

## 374 **Conclusions**

375 We conclude that the capacity of bacterial (ether-based) MSL production is extended to  
376 numerous members of bacterial phyla. These findings have wide implications for the biological  
377 sources of bacterial brGDGTs (based on *iso*-DA), which are extensively used for paleoclimate  
378 reconstruction<sup>24</sup>. Acidobacteria have been thought to be the biological sources of brGDGTs in  
379 specific environments (e.g., REF<sup>20</sup>) and have been detected in a few species of Acidobacteria<sup>6,7</sup>.  
380 However, several studies have pointed to other, multiple bacterial sources of brGDGTs,  
381 especially in anoxic settings where most MSL-producing acidobacteria cannot thrive<sup>39</sup>. In the  
382 current study, we predict the synthesis of bacterial ether MSLs by bacterial groups outside of  
383 the Acidobacteria, as well as yet-uncultured (facultative) anaerobic acidobacteria, being those  
384 commonly present in soils, freshwater and marine systems. This information will be essential  
385 to further constrain the interpretations made based on brGDGT distributions. The fact that the  
386 enzymes involved in the synthesis of bacterial (ether-based) MSLs are different from those  
387 forming GDGTs in Archaea (i.e., Tes enzyme<sup>9</sup>; and archaeal prenyl transferases<sup>31</sup>) indicates  
388 that similar membrane lipid features have been acquired independently in the evolution of lipid  
389 membranes, but likely emerged due to the same evolutionary pressure (e.g., increase of  
390 membrane stability). The potential synthesis of bacterial-type (ether) MSLs by archaeal  
391 members of the Asgard group, together with archaeal lipids, could be an adaptation leading to  
392 the hypothetical membrane transition from archaeal to bacterial type during eukaryogenesis.  
393 Follow-up studies will be needed to determine which physiological/environmental conditions  
394 trigger the formation of these membrane lipids and when and how this evolutionary trait was  
395 acquired and retained.

## 396 **Material and methods**

397 **Strains, media, and growth conditions.** *Thermotoga maritima* (strain MSB8, DSMZ-  
398 Deutsche Sammlung von Mikroorganismen und Zellkulturen GmbH, DSM 3109) was  
399 cultivated in basal media (BM) under anaerobic conditions in 120-ml batch cultures in 250 ml  
400 serum bottles. Cultures were incubated either at optimal (80°C) or lower (55°C) growth  
401 temperatures, and after three passages, the batch cultures were inoculated from the acclimated  
402 bottle. Growth was monitored by measuring the optical density (OD) at 600 nm and by  
403 fluorescent microscopy. Samples for proteomic, transcriptomic, or lipidomic analysis were  
404 derived from five replicates at each condition, for each analysis. The cells were harvested at  
405 early exponential, exponential, and stationary phases by centrifugation at 3500 rpm for 10 min  
406 at 4°C. The supernatant was discarded, and the remaining pellet was immediately frozen at -  
407 20°C until further processing for lipid, protein, or RNA extraction.

408 *Thermoanaerobacter ethanolicus* JW200 (REF<sup>40</sup>) (DMS 2246) was cultivated under anaerobic  
409 conditions in 80 ml batch cultures in 250 ml serum bottles. The media was composed of (per  
410 liter): (NH<sub>4</sub>)<sub>2</sub>SO<sub>4</sub> 1.3 g, KH<sub>2</sub>PO<sub>4</sub> 0.375 g, K<sub>2</sub>HPO<sub>4</sub> 0.75 g, MgCl<sub>2</sub> x 6H<sub>2</sub>O 0.4 g, CaCl<sub>2</sub> x 2H<sub>2</sub>O  
411 0.13 g, FeSO<sub>4</sub> x 7H<sub>2</sub>O (0.001% (w/v) in H<sub>2</sub>SO<sub>4</sub> 2 mM), yeast extract 4 g, resazurin standard  
412 stock solution 100x, and pH was adjusted to 6.7 with 5 M NaOH. The medium was  
413 anaerobically dispensed in 250 ml serum bottles, and a gas phase of N<sub>2</sub> was applied. After  
414 sterilization, individual bottles were supplemented with 20× cellobiose solution (100g/L) and  
415 100× dilution of L-cysteine hydrochloride monohydrate stock. Cultures were grown at 45°C or  
416 60°C for 1 sub-cultivation growth cycle to ensure acclimatization. Growth was monitored by  
417 measuring OD<sub>600nm</sub>. Cells were harvested at the early exponential (OD<sub>600nm</sub> 0.25), mid-  
418 exponential (OD<sub>600nm</sub> 0.4–0.5), late-exponential (OD<sub>600nm</sub> 0.65–0.73), and stationary (OD<sub>600nm</sub>  
419 0.62–0.67) growth phases. The experiments were performed in triplicate. At given OD<sub>600nm</sub>,

420 cultures of 80 ml were split in two and immediately centrifuged 15 min at 4600xg at 4°C. Half  
421 of the cultures were used for RNA sequencing, the other half for lipid extractions.

422 For the time-course <sup>13</sup>C labelling experiments with *T. ethanolicus* with labeled leucine, cells  
423 were anaerobically grown in 40 ml of media with either L-leucine or <sup>13</sup>C<sub>6</sub>-labeled leucine  
424 (Merck Sigma-Aldrich), added to a final concentration of 0.191 mM in the growth media, and  
425 samples were collected after 2, 20, and 90 min of incubation at 55°C and harvested according  
426 to the above-described procedure.

427 Strains of the phylum Firmicutes, Clostridia class analyzed for their lipid composition were  
428 cultured by DSMZ with their preferred media to stationary phase. Cultures were harvested by  
429 centrifugation and cell pellets freeze-dried before lipid analysis.

430 **Lipid extraction and analysis.** Fatty acids and membrane-spanning lipids (DA and *iso*-DA)  
431 were extracted from freeze-dried pellets and analyzed as previously described<sup>19</sup>. Core lipids  
432 were identified based on literature data and library mass spectra. The double bond positions  
433 present in the identified diacids were determined by derivatization with dimethyl disulfide  
434 (DMDS)<sup>41</sup> with some modifications (incubation at 40°C and then overnight, addition of 400 μL  
435 *n*-hexane and 200 μL 5% solution Na<sub>2</sub>S<sub>2</sub>O<sub>3</sub>, aqueous layer extracted two times with *n*-hexane),  
436 prior to mass spectrometric identification by GC-MS as described by REF<sup>19</sup>.

437 For the time-course <sup>13</sup>C labelling experiments with leucine, harvested cells of *T. ethanolicus*  
438 were frozen and freeze-dried. Lyophilized cells were hydrolyzed with 1.5N HCl in methanol  
439 by refluxing for 3 h and the pH was adjusted to neutral by KOH addition. The FAs and *iso*-DA  
440 in the obtained extracts were derivatized to their methyl esters using BF<sub>3</sub>-methanol solution and  
441 analyzed by GC-irmMS as previously described<sup>42,43</sup>.

442 **RNA extraction and transcriptomic analysis.** *T. maritima* cell pellets were defrosted on ice  
443 and washed with 500 μL of DNase/RNase free water (New England Biolabs). Cells were  
444 resuspended in 700 μL of RLT buffer, and 50 mg of acid-washed glass beads (0.1 μm diameter)

445 were added to a safe-lock tube containing the cell suspension. Cell disruption was performed  
446 with the OMNI bead mill Homogenizer (6.3 m/s) 2x. After centrifugation and separation of the  
447 cell lysate, the RNA was extracted with the RNeasy® Mini Kit (QIAGEN). The RNA  
448 concentration was determined using the Qubit® HS protocol (ThermoFisher). 18 µl (2 µg) of  
449 total RNA was hybridized with the Pan-Prokaryote riboPOOL 3'-biotinylated probe (siTOOLS  
450 Biotech). The rRNA was subsequently depleted with Hydrophilic streptavidin magnetic beads  
451 (New England Biolabs). The depleted rRNA sample was purified before library preparation  
452 with RNA clean and concentration (Zymo research) and eluted in 15 µl of DNase-/RNase- Free  
453 Water. Samples were QC analyzed with the Agilent RNA 6000 Nano Chips and the Agilent  
454 2100 Bioanalyzer system and stored at -80°C until library preparation.

455 For *T. ethanolicus*, cells cleared from medium were snap-frozen in dry-ice and stored at -80°C  
456 until usage. For RNA extraction the frozen cell pellets were resuspended in 4 ml RNA-later  
457 (Invitrogen) while maintained on ice. A 200 µl sample was taken from the cell suspension for  
458 RNA isolation. The cells were incubated at room temperature for 5 min. The cells were then  
459 pelleted for 10 min at 4700xg. The cell pellet was resuspended in 100 µl TE buffer pH 7.5. 500  
460 µl TRIzol reagent was added and mixed. The subsequent suspension was transferred to a pre-  
461 cooled 2 ml screw-cap tube supplemented with 250 µl sterile 0.1 mm and 1 mm glass beads.  
462 Cells were lysed by beating 6 rounds of 25 sec pulse at 6500 rpm and 5 min pause on watery  
463 ice. Ice-cold chloroform (200 µl) was subsequently added and mixed by shaking. Two phases  
464 were produced by centrifugation for 15 min. at 12,000xg. The transparent aqueous phase was  
465 transferred to a new RNase-free pre-cooled tube without disturbing the interphase. Ethanol was  
466 added at 1 volume and mixed. The isolate was transferred to an RNeasy column and  
467 centrifuged 15 seconds at 8000 xg to bind nucleic acids to the column. The column was rinsed  
468 with 350 µl RLT buffer by centrifugation. An 80 µl RNase-free DNase reaction mixture was  
469 added to the column and incubated 20 min at 30°C to digest DNA contaminants. The column

470 was rinsed with 350  $\mu$ l RW1, incubated 5 min and centrifuged. The column was then washed  
471 with 700  $\mu$ l RPE, centrifuged and washed with 80% ethanol. The column was dried by a 2 min  
472 spin at 21.000  $xg$ . To elute the RNA, 35  $\mu$ l nuclease-free water was added and eluted by 1 min  
473 centrifugation at 8,000  $xg$ . For rRNA depletion, 18  $\mu$ l (1  $\mu$ g) of total RNA was hybridized with  
474 the Pan-Prokaryote riboPOOL 3' biotinylated probe following the depletion protocol and stored  
475 at -80°C until library preparation.

476 For *T. maritima*, we sequenced 30 RNA samples, five biological replicates across three growth  
477 phases (early exponential, exponential and stationary) and two temperature conditions (55°C  
478 and 80°C). For *T. ethanolicus* we sequenced 18 RNA samples, three biological replicates across  
479 three growth phases (mid exponential, late exponential and stationary) and two temperature  
480 conditions (45°C and 60°C). rRNA depleted RNA samples were used to prepare sequencing  
481 libraries with the TruSeq RNA stranded kit and sequenced at the Utrecht Sequencing facility  
482 (USeq, The Netherlands) on an Illumina NextSeq500 sequencing platform in single-end mode  
483 with a read length of 75 nt.

484 Both transcriptomics libraries were treated equally unless specified otherwise. FASTQ files  
485 containing the Illumina reads were quality filtered and standard Illumina adapters removed  
486 using Trimmomatic v0.36 (REF<sup>44</sup>) (parameter settings: IlluminaClip: TruSeq3-SE.fa:2:30:10,  
487 leading: 20, trailing: 20, sliding window: 5: 20 min length: 40); poly-G tails were removed  
488 using cutadapt v1.16 with the --nextseq-trim parameter set to 20 (REF<sup>45</sup>). Gene counts were  
489 calculated using Salmon v1.1.0 (REF<sup>46</sup>) for the *T. maritima* MSB8 library and Salmon v1.3 for  
490 the *T. ethanolicus* JW 200, both with the mapping-based mode against the reference genome,  
491 being *T. maritima* MSB8 (REF<sup>47</sup>) (NCBI Reference Sequence: NC\_021214.1) and *T.*  
492 *ethanolicus* JW 200 (NCBI Reference Sequence: CP033580.1) respectively. Quantification  
493 estimates were imported into R/Bioconductor with tximport<sup>48</sup>, and differential gene expression  
494 between growth phases and temperatures was assessed with DESeq2 v1.26.0 (REF<sup>49</sup>) using the

495 default values. Genes with an adjusted p-value  $\leq 0.05$  were considered to demonstrate  
496 significant differential gene expression between the indicated sample groups. We report log<sub>2</sub>  
497 fold change values for these significantly upregulated or downregulated transcripts.

498 **Protein extraction and proteomic analysis.** After harvesting the cultures, the *T. maritima*  
499 frozen cell pellets were defrosted on ice, washed twice with 10 mL of 50 mM (Tris pH 8), and  
500 resuspended in 100  $\mu$ L of the same buffer. Cell suspensions were sonicated for 20 s (x4) to lyse  
501 the cells. Cell debris and unbroken cells were removed by centrifugation at 10,000 rpm for 10  
502 min at 4°C. The cell-free protein extracts were transferred to a 1.5 mL LoBind tube (Eppendorf)  
503 for further processing. Protein concentrations were determined with the Qubit<sup>®</sup> protocol for  
504 protein quantification (ThermoFisher). Proteins (60  $\mu$ g) were loaded to 12% Mini-PROTEAN<sup>®</sup>  
505 TGX<sup>™</sup> Precast Protein Gels, 10-well, 50  $\mu$ l (BIO-RAD) and run for 20 min at 120 V. Proteins  
506 were visualized by staining the gels for 3 h at room temperature with Colloidal Blue Staining  
507 Kit (ThermoFisher Scientific), washed with ultrapure (UP) water and de-stained for 18 h in UP  
508 water. Disulfide bridges were reduced with 20 mM dithiothreitol (DTT) in 50 mM ammonium  
509 bicarbonate (ABC) for 1 h at room temperature. Gels were washed with UP water (x3), followed  
510 by alkylation with 20 mM acrylamide in ABC. Each gel lane containing the samples was cut  
511 individually and sliced into smaller pieces of ca. 1 mm<sup>2</sup> and transferred to 0.5 mL-Protein  
512 LoBind tubes (Eppendorf). Samples were incubated at room temperature for 15 h in 200  $\mu$ l of  
513 0.05 ng/ $\mu$ l of trypsin solution. The enzymatic digestion was stopped and acidified by adding  
514 10% trifluoroacetic acid until the pH decreased between 2-4. Peptides were extracted by loading  
515 the samples onto an activated clean-up  $\mu$ column containing two C18 Attract SPE<sup>™</sup> (Affinisep)  
516 disks and ca. 2 mg Lichoprep RP-18 (Merck) as column material (25-40  $\mu$ m). The column was  
517 washed with 100  $\mu$ l of 1 ml/1 HCOOH in water and eluted with 100  $\mu$ l of acetonitrile : 1ml/1  
518 formic acid in water (1:1). Samples were concentrated with an Eppendorf concentrator at 45°C  
519 for about 2 h. The volume of each sample was adjusted to 50  $\mu$ l and stored at -20°C until they

520 were injected in the nLC 1000 (Thermo EASY nLC) MSMS as described by REF<sup>50</sup>. The  
521 MS/MS spectra were analyzed with MaxQuant 1.5.2.8 (REFs<sup>51,52</sup>) with default settings for the  
522 Andromeda search engine completed by on-default variable modification settings for the de-  
523 amidation on N and O. The protein sequence database for *T. maritima* MSB8 (downloaded from  
524 Uniprot March 2019) together with a contaminants custom database that contains sequences of  
525 common contaminants like Trypsins (P00760, bovin and P00761, porcin) and human keratins  
526 (Keratin K22E (P35908), Keratin K1C9 (P35527), Keratin K2C1 (P04264) and Keratin K1CI  
527 (P35527)) was used to identify the protein's identities based on the detected peptides. The  
528 “label-free quantification” as well as the “match between runs” options were enabled. De-  
529 amidated peptides were allowed to be used for protein quantification and all other quantification  
530 settings were kept default. An intensity-based label-free quantification (LFQ) method<sup>53,54</sup> was  
531 used for statistical comparisons (t-test) of normalized intensities of the protein groups between  
532 growth phases and temperature analysis. Filtering and statistical analyses were performed with  
533 Perseus v1.6.1. LFQ intensities were used for the analyses. For protein identification, groups  
534 were filtered to contain only proteins with at least two peptides of which at least one should be  
535 unique and at least one should be unmodified. Reverse hits and contaminants were filtered from  
536 the dataset. LFQ values were transformed to log<sub>10</sub>. For calculations, LFQ missing values were  
537 replaced by 6.8, a value slightly below the lowest measured value. A two-sample t-test with a  
538 false discovery rate (FDR) threshold set to 0.05 and significance:  $S_0 = 0.05$  were applied for  
539 comparisons. A protein was considered to be significantly up or down regulated when the  
540 protein abundance ratio was  $>0.05$ . Protein level changes between growth phases or growth  
541 temperatures were visualized with voronoi-treemaps<sup>55</sup> using the Paver Software (Decodon,  
542 GmbH). The functional annotation was retrieved from the Kyoto Encyclopedia of Genes and  
543 Genomes (KEGG) for *T. maritima* MSB8. The data utilized for visualization depicts the log<sub>10</sub>-  
544 ratios of the mentioned comparison.



545 **Selection of potential MSL synthases.** The selection criteria for the detection of MSL  
546 synthases included those genes found to be activated either in the *T. maritima* transcriptome  
547 and/or proteome, and in the *T. ethanolicus* transcriptome, respectively, following the criteria  
548 specified above. The selected genes and proteins for the MSL synthase were retrieved after  
549 screening their annotation and assigned biosynthetic pathways with KEGG and UniProt (The  
550 UniProt Consortium 2021). Searches for potential homologous proteins in *Butyrivibrio*  
551 *fibrisolvens* and *Clostridium ventriculi* were performed with the PSI-BLAST algorithm  
552 (Position-Specific iterated BLAST)<sup>56</sup> at the protein level search using the UniProt ID from the  
553 selected radical or membrane proteins as a query (Supplementary Table 15). For *T. ethanolicus*,  
554 we performed a blast search of the candidates against NCBI NR database (downloaded  
555 November 2020) removing proteins belonging to any species from the *Thermoanaerobacter*  
556 genus (taxid: 1754). We achieved this by providing a negative sequence id list (Supplementary  
557 File 3), the search was done with a minimum e-value of 0.0001 and 50 maximum target  
558 sequences, and we kept the best hit for each query sequence.

559 We downloaded all genomes from species that are known to produce DAs from the PATRIC  
560 genome database<sup>57</sup> on January 29th, 2021. Apart from *T. maritima*<sup>4</sup>, other diabolic acid  
561 producers include *Butyrivibrio fibrisolvens*, *Clostridium ventriculi*, and *Fervidobacterium*  
562 *pennivorans*, *Pseudothermotoga elfii*, *Pseudothermotoga hypogea*, *Pseudothermotoga*  
563 *lettingae*, *Thermosipho africanus*, *Thermosipho melanesiensis*, and *Thermotoga neapolitana*  
564 (Supplementary Table 21). No genomes of *Pseudothermotoga subterranea* were present in the  
565 PATRIC database. For *T. maritima*, these include the assemblies<sup>47,58</sup>, on which the GenBank  
566 and UniProt annotations are based, and that were used for our transcriptomic and proteomic  
567 analyses (PATRIC ID 243274.17 (GCA\_000390265.1\_ASM39026v1) and 243274.5,  
568 respectively).



569 Completeness and contamination were estimated with CheckM v1.1.3 (REF<sup>59</sup>) in lineage\_wf  
570 mode, and genomes whose completeness – 5 x contamination was lower than 70% -- were  
571 excluded, as were plasmids. The resulting 50 genomes were annotated with Prokka v1.14.6  
572 (REF<sup>60</sup>) with the --kingdom flag set to Bacteria. Orthologues were identified with Roary v13.3.0  
573 (REF<sup>61</sup>), with the minimum percentage identity for blastp (-i) set to 10% and MCL inflation  
574 value (-iv) set to 1.5 to allow for sequence divergence of the highly diverse set of species, and  
575 the -s flag (do not split paralogs) set. Transmembrane helices were identified in the predicted  
576 proteins with TMHMM v2.0c (REF<sup>62</sup>) <http://www.cbs.dtu.dk/services/TMHMM/>. Proteins  
577 predicted by Prokka were linked to those in the GenBank and UniProt annotation files by bi-  
578 directional best blastp hit (the GenBank proteins to the proteins predicted from PATRIC  
579 identifier 243274.17, and the UniProt proteins to the proteins predicted from ID 243274).

580 **Recombinant production of candidate MSL synthases and GeR coding genes.** To examine  
581 the potential enzymatic activity of the candidate MSL synthases and GeR coding genes (see  
582 Supplementary Tables 16, 17, and Supplementary Information), they were commercially  
583 synthesized (Eurofins, Germany), subcloned in pET29b or pCDFDuet-1 and expressed in the  
584 *E. coli* BL21 DE3 strain. For the case of the potential MSL synthase genes (see Supplementary  
585 Tables 16, 17) liquid cultures (50 ml) of exponentially growing *E. coli* harboring the empty  
586 expression vector or the vector including the coding gene were grown in 2×YT medium at 37°C  
587 and induced with 0.2 mM IPTG for 3 and 16 h both anaerobically and aerobically. To test the  
588 activity of the potential modified-plsA genes (GeR-coding gene), liquid cultures of  
589 exponentially growing *E. coli* harboring an empty pET29b or pET29b-coding gene were grown  
590 in 2×YT media at 37°C, induced with 0.2 mM IPTG, and incubated at 25°C for 3 h and 16 h  
591 both anaerobically and aerobically. The expression of the proteins was verified using 12% Mini-  
592 PROTEAN TGX precast gels (Bio-Rad), stained with Colloidal blue staining (Invitrogen™).

593 **Homology searches of MSL synthases and GeR enzymes and phylogenetics.** Confirmed

594 MSL synthase of *T. ethanolicus* and glycerol ester reductase (GeR) of *T. maritima* MSB8)

595 were queried with DIAMOND v2.0.6 (REF<sup>63</sup>) against the NCBI non-redundant protein

596 sequence database (nr) (REF<sup>64</sup>) downloaded on 7 January 2021. Hits with an e-value  $\leq 1e^{-50}$

597 and query coverage of  $\geq 30\%$  were selected. Proteins were clustered with cd-hit v4.8.1 (REF<sup>65</sup>)

598 using a sequence identity threshold of 0.7, and representative sequences were aligned with

599 Clustal Omega v1.2.4 (REF<sup>66</sup>). Gaps in the alignments were removed with trimAl v1.4.rev15

600 [REF] in -gappyout mode. Phylogenetic trees were constructed with IQ-TREE v2.1.2 (REF<sup>67</sup>)

601 with 1,000 ultrafast bootstraps. Model selection<sup>68</sup> was based on nuclear models and the best-fit

602 model was chosen according to BIC (LG+R10 for both genes). Maximum-likelihood trees were

603 visualized in iTOL<sup>69</sup>.

604 **3D Model and protein domain analysis.** Sequences of MSL synthases of *iso*-DA and DA

605 producers were retrieved with BLASTP<sup>70</sup>. The alignment was performed with MAFFT (REF<sup>71</sup>)

606 in the <https://www.ebi.ac.uk/Tools/msa/mafft/> server using the BLOSUM62 substitution

607 matrix, a gap open penalty of 1.53 and a gap extension of 0.12. The multiple sequence alignment

608 was edited with Jalview<sup>72</sup> and the amino acid regions forming the conserved blocks in all MSL

609 synthases were retrieved by coloring by 100% percentage identity of conservation between the

610 proteins. Structure-based alignment showing conserved hydrophobic regions<sup>73</sup> between *iso*-DA

611 and DA producers were colored based on percentage of conservation (90%) of the hydrophobic

612 or hydrophilic residues. The secondary structure prediction showed in the alignment was

613 performed with Jpred. The 3D models of the proteins were calculated with AlphaFold V2.1.0

614 with the Google Colab platform

615 (<https://colab.research.google.com/github/deepmind/alphafold/blob/main/notebooks/AlphaFol>

616 [d.ipynb](https://colab.research.google.com/github/deepmind/alphafold/blob/main/notebooks/AlphaFol)), accessed in February 2022, with no templates and refined using the relax option. The

617 resulting prediction was visualized using the PyMol software<sup>74</sup>.

618 **Data availability**

619 RNAseq and proteomics data is in the process of being submitted to NCBI and  
620 ProteomeCentral, respectively. Lipid analysis raw files will be deposited in Zenodo.org upon  
621 acceptance of the manuscript. All raw materials are available to reviewers upon request.

622 **Code availability**

623 Not applicable

624

625 **Acknowledgements**

626 We thank Marcel van der Meer for help in the labeled incubation data interpretation. This  
627 project received funding from the European Research Council (ERC) under the European  
628 Union's Horizon 2020 research and innovation program (grant agreement no. 694569-  
629 MICROLIPIDS) to JSSD. LV and JSSD receive funding from the Soehngen Institute for  
630 Anaerobic Microbiology (SIAM) through a Gravitation Grant (024.002.002) from the Dutch  
631 Ministry of Education, Culture, and Science (OCW). KF (PI-LV) receives funding from the  
632 Simons-Moore foundation.

633 **Contributions**

634 DXSC designed the experiments, executed the experiments, analyzed the data, interpreted the  
635 results and wrote the paper; MS designed and executed part of the experiments, JCE, AAA  
636 contributed to the bioinformatic analysis, SB executed and interpreted the proteomic data, MK  
637 and NB performed the lipid analysis and interpretation, FABvM contributed to the  
638 bioinformatic and phylogenetic analyses, LSvS and KF contributed to the gene expression  
639 assays. JSSD and LV acquired funding, contributed to the design of the experiments,  
640 interpretation of the data, and writing of the manuscript. All co-authors have read and approved  
641 the manuscript.

## Figures

**Figure 1. Membrane-spanning lipids are produced via condensation of fatty acids.** (a) The  $C_{30}$  *iso*-diabolic acid is thought to be formed by coupling two *iso*- $C_{15}$  FAs at their ultimate ( $\omega$ ) carbon atoms. The synthesis of  $C_{32}$  diabolic acid proceeds through coupling of two *n*- $C_{16}$  FAs at the penultimate ( $\omega-1$ ) carbon atoms. (b) Relative abundance (%) of core lipids of *iso*- $C_{15}$  and *iso*-diabolic acid  $C_{30}$  in cultures of *T. ethanolicus* grown at 60°C across growth phases (see Supplementary Table 1 and Supplementary Information) and of  $C_{16}$  and diabolic acid  $C_{32}$  in cultures of *T. maritima* grown at 80°C across growth phases (see Supplementary 2, Supplementary Table 3, and Supplementary Information for further details). In both experiments the relative abundance of MSLs increases with growth. All experiments were performed in triplicate and the error bars indicate  $\pm$  SD. (c) Labelling experiment using  $^{13}\text{C}$ -labeled leucine added to cultures of *T. ethanolicus*, lead to the formation of labeled *iso*- $C_{15}$ , and subsequently to labeled  $C_{30}$  *iso*-diabolic acid in a time-course experiment (see Supplementary Table 2 and Supplementary Information). The degree of labelling is indicated by their  $\delta^{13}\text{C}$  values. The leucine-derived carbon atoms (in green) form a part of the carbon skeleton of the  $C_{30}$  *iso*-diabolic acid. All experiments were performed in triplicate and the error bars indicate  $\pm$  SD.

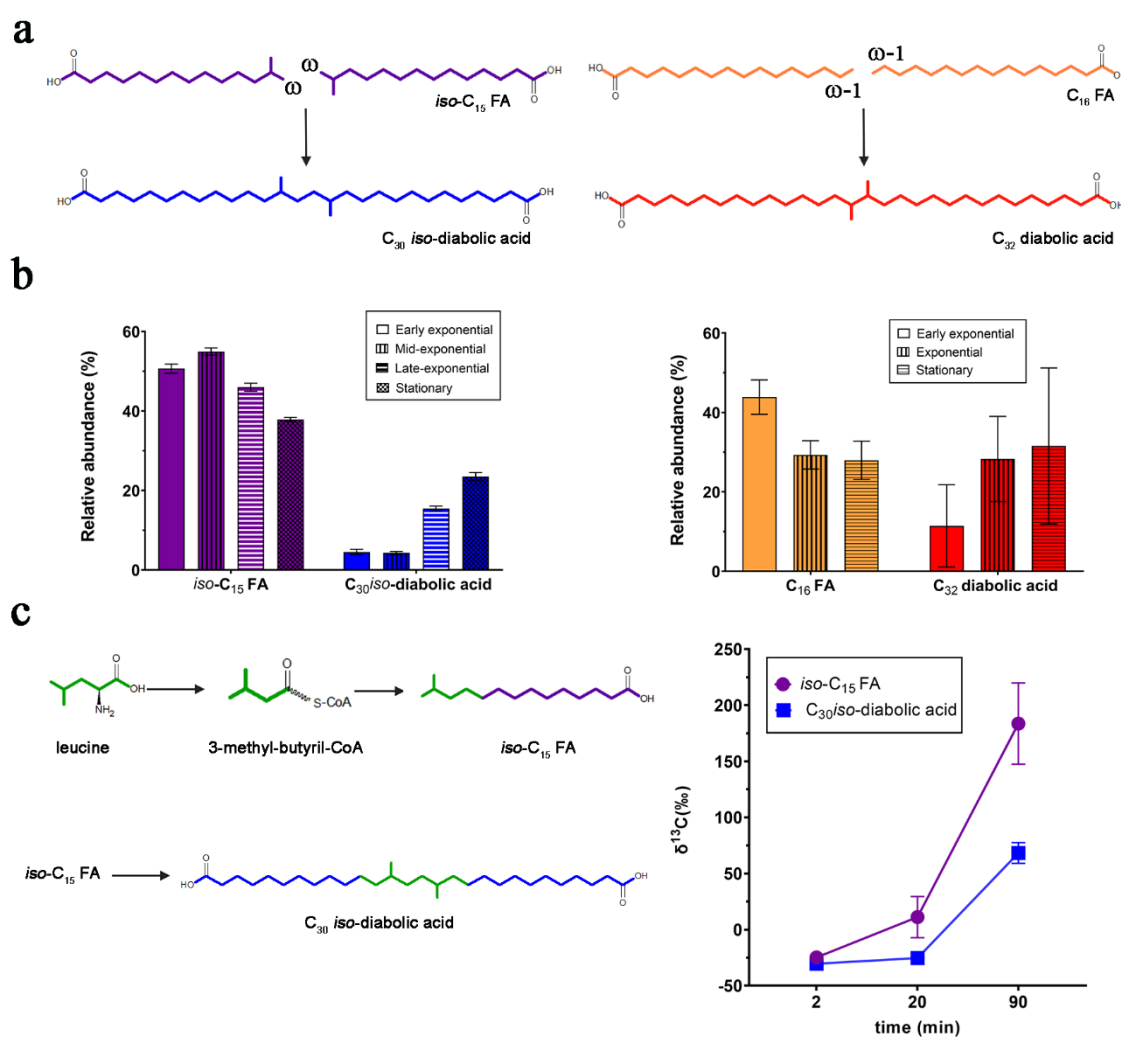

**Figure 2. Expression of the bacterial MSL synthases of *T. ethanolicus* and *T. maritima* in *E. coli* results in the production of MSLs through condensation of the tails of two FAs at the  $\omega$  and  $\omega-1$  positions.** (a) Partial GC chromatograms (44–48 min) of the base hydrolyzed lipid extract of *E. coli* BL21 (DE3) with ‘empty’ pET29b plasmid (upper trace) or pET29b *mslS* of *T. ethanolicus* plasmid (lower trace), revealing the formation of two major new components, which were identified as C<sub>33</sub> and C<sub>34</sub> mono- and bicyclic diacids formed by condensation at the  $\omega$ -positions of the cyclopropane-containing FAs produced by *E. coli*. (b) Partial GC chromatograms (42–44 min) of the base hydrolyzed lipid extract of *E. coli* BL21 (DE3) with the ‘empty’ pCDFDuet-1 plasmid (upper trace) or pCDFDuet *mslS* of *T. maritima* (lower trace) shows the formation of the C<sub>32</sub> diabolic acids by C-C bond formation between the  $\omega-1$  position of two C<sub>16</sub> fatty acids. (c) Mass spectra of the diacids and diabolic acids formed. To confirm the presence the cyclopropyl moieties the compounds were hydrogenated but remained unaltered.

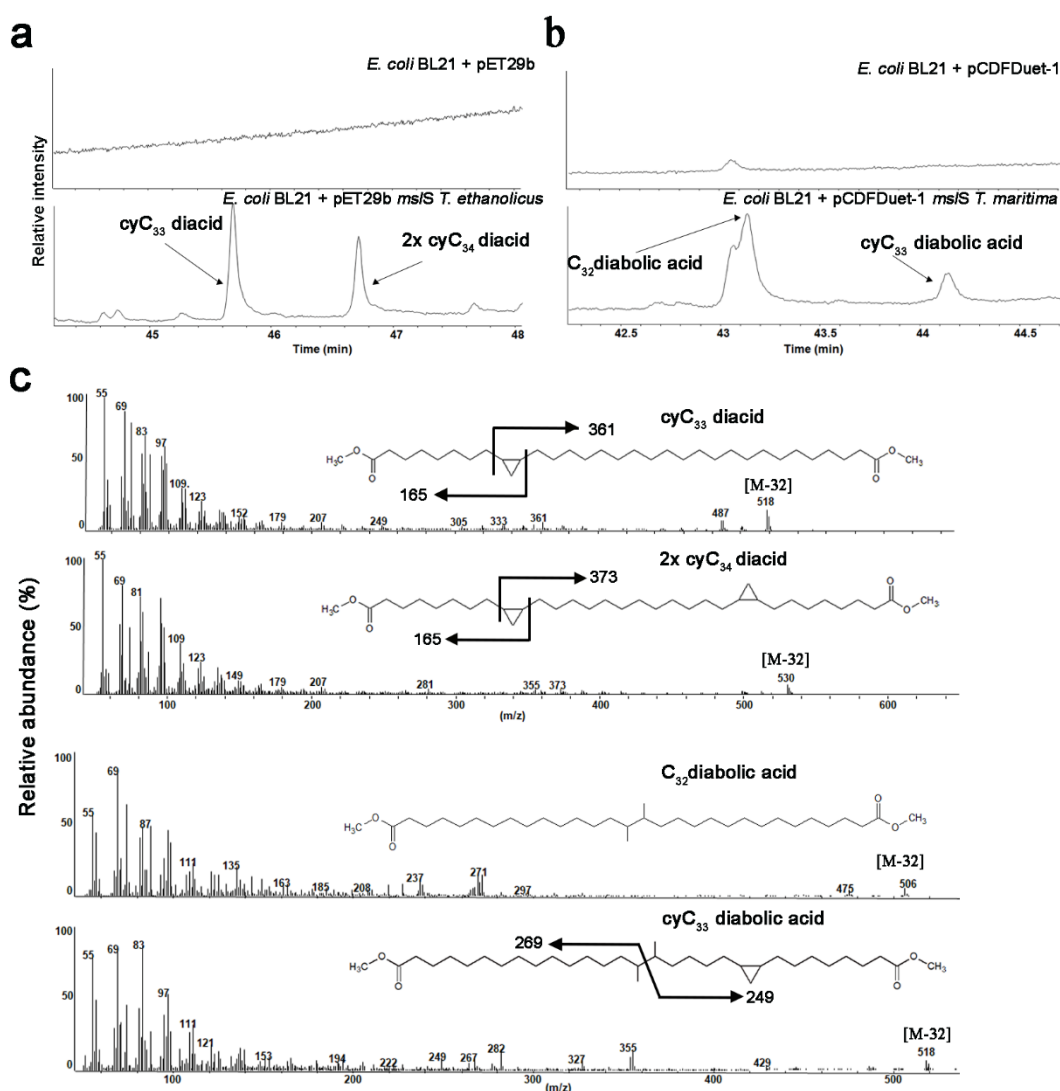

**Figure 3. Expression of the modified PlsA of *T. maritima* and *D. alkenivorans* in *E. coli* results in the production of ether lipids.** Partial GC extracted ion chromatograms ( $m/z$  205; 24–25.5 min) of the base hydrolyzed lipid extract of *E. coli* BL21 (DE3) with ‘empty’ pET29b plasmid (upper trace) or pET29b containing the mPlsA (Tmari 0479) of *T. maritima* (middle trace) and of *D. alkenivorans* (SHJ90043) (bottom trace) revealing the formation of C<sub>16</sub> glycerol monoether (MGE, or 1-*O*-hexadecyl glycerol) by *E. coli*

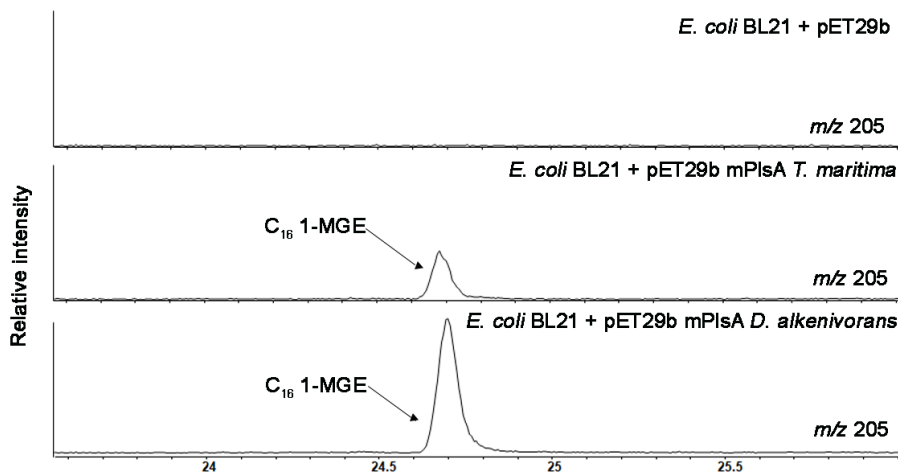



**Figure 4. Protein alignment of a section of the two types of bacterial MSL synthases and 3D structures of the MSL synthases from *T. ethanolicus* and *T. maritima*.** (a) MSLs producing *iso*-DAs. Key: 1 *Fervidicola ferrireducens*, 2 *Thermosediminibacter oceani*, 3 *Thermoanaerobacter wiegelii*, 4 *Moorella thermoacetica*, 5 *Caldicellulosiruptor owensensis*, 6 *Caldanaerobacter subterraneus*, 7 *Thermoanaerobacter siderophilus*, 8 *Thermoanaerobacter thermohydrosulfuricus*, 9 *Thermoanaerobacter ethanolicus* and (b) MSLs producing DAs. 1 *Thermotoga maritima*, 2 *Thermotoga neapolitana*, 3 *Pseudothermotoga elfii*, 4 *Pseudothermotoga hypogea*, 5 *Thermosiphon africanus*, 6 *Thermosiphon melanesiensis*, 7 *Fervidobacterium pennivorans*, 8 *Butyrivibrio fibrisolvens*, 9 *Sarcina ventriculi*, 10 *Dictyoglomus thermophilum*, 11 *Dictyoglomus turgidum*. Predicted amino acid regions colored according to hydrophobicity<sup>72</sup> the most hydrophobic residues are red and most hydrophilic are colored blue. Lower panel depicts the modelled 3D structures of the MSL synthases of (c) *T. ethanolicus* and of (d) *T. maritima* zoomed in on the region of the conserved cysteines (red), the SAM binding motif (blue) and the region corresponding to the alignment proposed to interact with the lipid substrate (yellow).

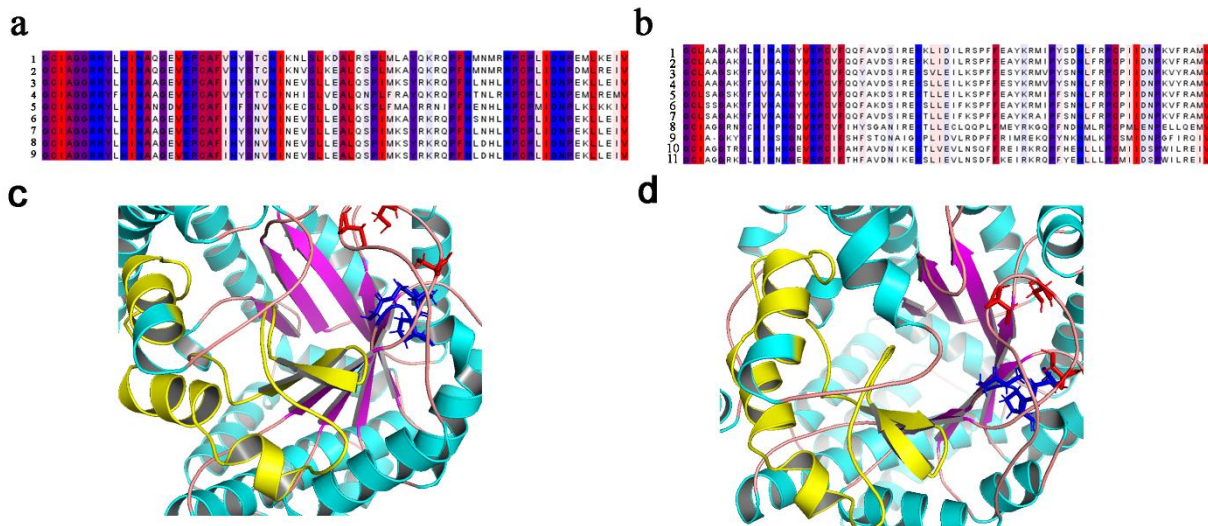

## Figure 5. The widespread capability of MSL and ether lipid production in the Bacteria and Archaea domain

Maximum likelihood phylogenetic tree of the predicted homologs of the confirmed (a) MSL synthase and (b) ether bond-forming enzyme, GeR, across the tree of life grouped at the phylum or superphylum level as shown with the colors on the branches and indicated in the legend. Similar sequences were clustered based on sequence identity before tree inference. Purple, green and orange triangles indicate the genomes of microorganisms with homologs that have been seen to synthesize diabolic, *iso*-diabolic or ether-bonds in screened cultures listed in Supplementary Table 21. Colored circles in the tree indicate archaeal taxa. Full trees can be seen in the Supplementary Files 1 and 2. Scale bars represent number of substitutions per site.

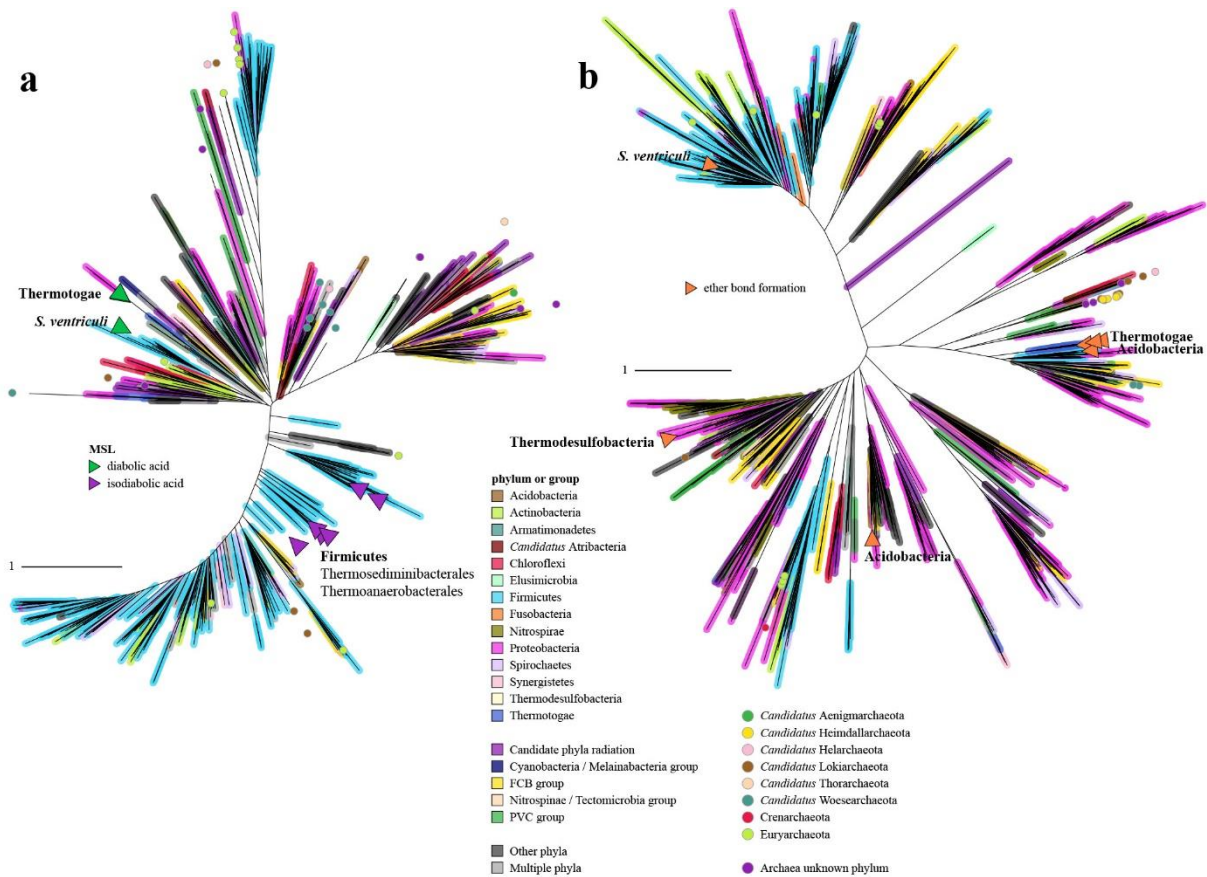



## References

1. Jung, S., Lowe, S. E., Hollingsworth, R. I., & Zeikus, J. G. Sarcina ventriculi synthesizes very long chain dicarboxylic acids in response to different forms of environmental stress. *Journal of Biological Chemistry* 268, 2828–2835 (1993).
2. Klein, R. A., Hazlewood, G. P., Kemp, P., & Dawson, R. M. C. A new series of long-chain dicarboxylic acids with vicinal dimethyl branching found as major components of the lipids of *Butyrivibrio* spp. *Biochemical Journal* 183, 691–700 (1979).
3. Carballeira, N. M., Reyes, M., Sostre, A., Huang, H., Verhagen, M. F. J. M., & Adams, M. W. W. Unusual fatty acid compositions of the Hyperthermophilic archaeon *Pyrococcus furiosus* and the bacterium *Thermotoga maritima*. *Journal of Bacteriology* 179, 2766–2768 (1997).
4. Sinninghe Damsté, J. S., Rijpstra, W. I. C., Hopmans, E.C., Schouten, S., Balk, M., & Stams, A.J.M. Structural Characterization of Diabolic Acid-Based Tetraester, Tetraether and Mixed Ether/Ester, Membrane-Spanning Lipids of Bacteria from the Order Thermotogales.” *Archives of Microbiology* 188, 629–641 (2007).
5. Jung, S., Zeikus, J. G., & Hollingsworth. A new family of very long chain alpha,omega-dicarboxylic acids is a major structural fatty acyl component of the membrane lipids of *Thermoanaerobacter ethanolicus* 39E. *Journal of Lipid Research* 35, 1057–1065 (1994).
6. Sinninghe Damsté, J. S., Rijpstra, W. I. C., Hopmans, E. C., Weijers, J. W., Foessel, B. U., Overmann, J., & Dedysh, S. N. 13,16-Dimethyl octacosanedioic acid (iso-diabolic acid), a common membrane-spanning lipid of Acidobacteria subdivisions 1 and 3. *Applied and Environmental Microbiology* 77, 4147–4154 (2011).
7. Sinninghe Damsté, J. S., Rijpstra, W. I. C., Foessel, B. U., Huber, K. J., Overmann, J., Nakagawa, S., Kim, J. J., Dunfield, P. F., Dedysh, S. N., & Villanueva, L. An overview of the occurrence of ether- and ester-linked iso-diabolic acid membrane lipids in microbial cultures of the Acidobacteria: Implications for brGDGT paleoproxies for temperature and pH. *Organic Geochemistry* 124, 63–76 (2018).
8. Fitz, W., & Arigoni, D. Biosynthesis of 15,16-Dimethyltriacontanedioic Acid (Diabolic Acid) from [16-<sup>3</sup>H]- and [14-<sup>2</sup>H<sub>2</sub>]-Palmitic Acids. *Journal of the Chemical Society, Chemical Communications* 20,1533–1534 (1992).
9. Zeng, Z., Chen, H., Yang, H., Chen, Y., Yang, W., Feng, X., Pei, H., & Welander, P. Identification of a protein responsible for the synthesis of archaeal membrane-spanning GDGT lipids. *Nature Communications* 13, 1545 (2022).
10. Huber, R., Wilharm, T., Huber, D., Trincone, A., Burggraf, S., Konig, H., Reinhard, R., Rockinger, I., Fricke, H., & Stetter, K. O. *Aquifex pyrophilus* gen. nov. sp. nov., Represents a novel group of marine hyperthermophilic hydrogen-oxidizing bacteria. *Systematic and Applied Microbiology* 15, 340–351 (1992).
11. Huber, H., Rossnagel, P., Woese, C. R., Rachel, R., Langworthy, T.A., & Stetter K. O. Formation of ammonium from nitrate during chemolithoautotrophic growth of the extremely thermophilic bacterium *Ammonifex degensii* gen. nov. sp. Nov. *Systematic and Applied Microbiology* 19, 40–49 (1996).
12. Sinninghe Damsté, J.S., Rijpstra, W. I. C., Geenevasen, J. A., Strous, M., and Jetten, M. S. Structural identification of ladderane and other membrane lipids of planctomycetes capable of anaerobic ammonium oxidation (anammox). *FEBS Journal* 272, 4270–4283 (2005).

13. Langworthy, T. A., Holzer, G., Zeikus, J. G., and Tornabene, T. G. Iso- and anteiso-branched glycerol diethers of the thermophilic anaerobe *Thermodesulfotobacterium commune*. *Systematic and Applied Microbiology* 4, 1–17 (1983).
14. Grossi, V., Mollex, D., Vinçon-Laugier, A., Hakil, F., Pacton, M.m Cravo-Laureau, C. Mono- and dialkyl glycerol ether lipids in anaerobic bacteria: biosynthetic insights from the mesophilic sulfate reducer *Desulfatibacillum alkenivorans* PF2803T. *Applied and Environmental Microbiology* 81, 3157–3168 (2015).
15. Ring, M. W., Schwär, G., Thiel, V., Dickschat, J. S., Kroppenstedt, R. M., Schulz, S., & Bode, H. B. Novel iso-branched ether lipids as specific markers of developmental sporulation in the myxobacterium *Myxococcus xanthus*. *Journal of Biological Chemistry* 281, 36691–36700 (2006).
16. Goldfine, H. The appearance, disappearance and reappearance of plasmalogens in evolution. *Progress in Lipid Research* 49, 493–498 (2010).
17. Lorenzen, W., Ahrendt, T., Bozhüyük, K. A., & Bode, H. B. A multifunctional enzyme is involved in bacterial ether lipid biosynthesis. *Nature Chemical Biology* 10, 425–427 (2014).
18. Jackson, D. R., Cassilly, C. D., Plichta, D. R., Vlamakis, H., Liu, H., Melville, S. B., Xavier, R. J., & Clardy, J. Plasmalogen biosynthesis by anaerobic bacteria: Identification of a two-gene operon responsible for plasmalogen production in *Clostridium perfringens*. *ACS Chemical Biology* 16, 6–13 (2021).
19. Sahonero-Canavesi, D., Villanueva, L., Bale, N. J., Bosviel, J., Koenen, M., Hopmans, E. C., & Sinninghe Damsté, J.S. Changes in the Distribution of Membrane Lipids during Growth of *Thermotoga maritima* at Different Temperatures: Indications for the Potential Mechanism of Biosynthesis of Ether-Bound Diabolic Acid (Membrane-Spanning) Lipids. *Applied and Environmental Microbiology* 88, e0176321 (2022).
20. Weijers, J. W., Schouten, S., van den Donker, J. C., Hopmans, E. C., & Sinninghe Damsté, J.S. Environmental controls on bacterial tetraether membrane lipid distribution in soils. *Geochemica et Cosmochimica Acta* 71, 703–713 (2007).
21. Jimenez-Rojo, N., & Riezman, H. On the road to unraveling the molecular functions of ether lipids. *FEBS Letters* 593, 2378–2389 (2019).
22. Koga, Y., Thermal adaptation of the archaeal and bacterial lipid membranes. *Archaea* 2012, 789652 (2012).
23. Sinninghe Damsté, J. S., Hopmans, E. C., Pancost, R. D., Schouten, S., & Geenevasen J.A.J. Newly discovered non-isoprenoid dialkyl diglycerol tetraether lipids in sediments. *Journal of the Chemical Society, Chemical Communications* 23, 1683–1684 (2000).
24. Schouten, S., Hopmans, E. C., & Sinninghe Damsté, J.S. The organic geochemistry of glycerol dialkyl glycerol tetraether lipids: A review. *Organic Geochemistry* 54, 19–61 (2013).
25. Nemoto, N., Shida, Y., Shimada, H., Oshima, T., & Yamagishi, A. Characterization of the precursor of tetraether lipid biosynthesis in the thermoacidophilic archaeon *Thermoplasma acidophilum*. *Extremophiles* 7, 235–243 (2003).
26. Kaneda, T. Iso- and anteiso-fatty acids in bacteria: biosynthesis, function, and taxonomic significance. *Microbiology Reviews* 55, 288–302 (1991).
27. Galliker, P., Gräther, O., Rümmler, M., Fitz, W., & Arigoni, D. New structural and biosynthetic aspects of the unusual core lipids from Archaeobacteria. In: Kräutler B, Arigoni D, Golding B, editors. Vitamin B<sub>12</sub> and B<sub>12</sub>-proteins: lectures presented at the 4th European

- Symposium on Vitamin B<sub>12</sub> and B<sub>12</sub>-Proteins. Weinheim, Germany: Wiley-VCH; pp. 447–458 (1998).
28. Broderick, J. B., Duffus, B. R., Duchene, K. S., & Shepard, E. M. Radical S-Adenosylmethionine Enzymes. *Chemical reviews* 114, 4229–4317 (2014).
  29. Teo, A. C. K., Lee, S. C., Pollock, N. L., Stroud, Z., Hall, S., Thakker, A., Pitt, A. R., Dafforn, T. R., Spickett, C. M., & Roper, D. I. Analysis of SMALP co-extracted phospholipids shows distinct membrane environments for three classes of bacterial membrane protein. *Scientific Reports* 12, 1813 (2019).
  30. Kielak, A. M., Barreto, C. C., Kowalchuk, G. A., van Veen, J. A., & Kuramae, E. E. The Ecology of Acidobacteria: Moving beyond Genes and Genomes. *Frontiers in Microbiology* 7, 744 (2016).
  31. Koga, Y., & Morii, H. Biosynthesis of ether-type polar lipids in Archaea and evolutionary considerations. *Microbiology Molecular Biology Reviews* 71, 97–120 (2007).
  32. Villanueva, L., von Meijenfeldt, F.A.B., Westbye, A.B., Yadav, S., Hopmans, E.C., Dutilh, B.E., & Sinninghe Damsté, J.S. Bridging the membrane lipid divide: bacteria of the FCB group superphylum have the potential to synthesize archaeal ether lipids. *ISME Journal* 15, 168–182 (2020).
  33. Gattinger, A., Schlöter, M., & Munch, J. C. Phospholipid ether lipid and phospholipid fatty acid fingerprints in selected euryarchaeotal monocultures for taxonomic profiling. *FEMS Microbiology Letters* 213, 133–139 (2002).
  34. Lombard, J., López-García, P., & Moreira, D. The early evolution of lipid membranes and the three domains of life. *Nature Reviews Microbiology* 10, 507–515 (2012).
  35. Villanueva, L., Schouten, S., & Sinninghe Damsté, J. S. Phylogenomic analysis of lipid biosynthetic genes of Archaea shed light on the ‘lipid divide’. *Environmental Microbiology* 19, 54–69 (2017).
  36. Spang, A., Saw, J. H., Jørgensen, S. L., Zaremba-Niedzwiedzka, K., Martijn, J., Lind, A. E., et al. Complex Archaea that bridge the gap between prokaryotes and eukaryotes. *Nature* 521, 173–179 (2015).
  37. Jahn, U., Summons, R., Sturt, H., Grosjean, E., & Huber, H. Composition of the lipids of *Nanoarchaeum equitans* and their origin from its host *Ignicoccus* sp. strain KIN4/I. *Archives in Microbiology* 182, 404–413 (2004).
  38. Imachi, H., Nobu, M. K., Nakahara, N., Morono, Y., Ogawara, M., Takaki, Y., et al. Isolation of an archaeon at the prokaryote-eukaryote interface. *Nature* 577, 519–525 (2020).
  39. Weber, Y., Sinninghe Damsté, J. S., Zopfi, J., De Jonge, C., Gilli, A., Schubert, C. J., Lepori, F., Lehmann, M. F., & Niemann, H. Redox-dependent niche differentiation provides evidence for multiple bacterial sources of glycerol tetraether lipids in lakes. *Proceedings of the National Academy of Sciences USA* 115, 10926–10931 (2018).
  40. Lee, Y. E., Jain, M. K., Lee, C., Lowe, S. E. & Zeikus, J. G. Taxonomic distinction of saccharolytic thermophilic anaerobes: description of *Thermoanaerobacterium xylanolyticum* gen. nov., sp. nov., and *Thermoanaerobacterium saccharolyticum* gen. nov., sp. nov.; reclassification of *Thermoanaerobium brockii*, *Clostridium thermosulfurogenes*, and *Clostridium thermohydrosulfuricum* E100-69 as *Thermoanaerobacter brockii* comb. nov., *Thermoanaerobacterium thermosulfurogenes* comb. nov., and *Thermoanaerobacter thermohydrosulfuricus* comb. nov., respectively; and transfer of *Clostridium thermohydrosulfuricum* 39E to *Thermoanaerobacter ethanolicus*. *International Journal Systematic Bacteriology* 43, 41–51 (1993).

41. Blokker, P., Schouten, S., van den Ende, H., de Leeuw, J. W., & Sinninghe Damsté, J. S. Cell wall-specific w-hydroxy fatty acids in some freshwater green microalgae. *Phytochemistry* 49, 691–695 (1998).
42. Bale, N. J., Rijpstra, W. I. C., Oshkin, I. Y., Belova, S.E., Dedysh, S.N., & Sinninghe Damsté, J.S. Fatty acid and hopanoid adaption to cold in the methanotroph *Methylovulum psychrotolerans*. *Frontiers in Microbiology* 10, 589 (2019).
43. Schouten, S., Klein Breteler, W. C. M., Blokker, P., Schogt, N., Rijpstra, W. I. C., Grice, K., baas, M., & Sinninghe Damsté, J.S. Biosynthetic effects on the stable carbon isotopic compositions of algal lipids: Implications for deciphering the carbon isotopic biomarker record. *Geochimica et Cosmochimica Acta* 62, 1397–1406 (1998).
44. Bolger, A. M., Lohse, M., & Usadel, B. Trimmomatic: a flexible trimmer for Illumina sequence data. *Bioinformatics* 30, 2114–2120 (2014).
45. Martin, M. Cutadapt removes adapter sequences from high-throughput sequencing reads *EMBnet* 17, 10–12 (2011).
46. Patro, R., Duggal, G., Love, M. I., Irizarry, R. A., & Kingsford, C. Salmon provides fast and bias-aware quantification of transcript expression. *Nature Methods* 14, 417–419 (2017).
47. Latif, H., Lerman, J. A., Portnoy, V. A., Tarasova, Y., Nagarajan, H., Schrimpe-Rutledge, A. C., Smith, R. D., Adkins, J. N., Lee, D. H., Qiu, Y., & Zengler, K. The genome organization of *Thermotoga maritima* reflects its lifestyle. *Plos Genetics* 9, e1003485 (2013).
48. Sonesson, C., Love, M. I., & Robinson, M. D. Differential analyses for RNA-seq: transcript-level estimates improve gene-level inferences. *F1000Research* (2016).
49. Love, M. I., Huber, W., & Anders, S. Moderated estimation of fold change and dispersion for RNA-seq data with DESeq2. *Genome Biology* 15, 550 (2014).
50. Liu, Y., de Groot, A., Boeren, S., Abee, T., & Smid, E. J. Lactococcus lactis mutants obtained from laboratory evolution showed elevated vitamin K2 content and enhanced resistance to oxidative Stress. *Frontiers in microbiology* 12:746770 (2021).
51. Cox, J., Hein, M. Y., Lubner, C. A., Paron, I., & Nagaraj, N. Accurate proteome-wide label-free quantification by delayed normalization and maximal peptide ratio extraction, termed MaxLFQ. *Molecular & Cellular Proteomics* 13.9, 2513–2526 (2014).
52. Hubner, N. C., Bird, A. W., Cox, J., Sppllettstoesser, B., Bandilla, P., Poser, I., Hyman, A., & Mann, M. Quantitative proteomics combined with BAC TransgeneOmics reveals in vivo protein interactions. *Journal of Cell Biology* 189, 739–754. (2010).
53. Smaczniak C., Li N., Boeren S., America T., van Dongen W., Goerdayal S. S., et al. Proteomics-based identification of low-abundance signaling and regulatory protein complexes in native plant tissues. *Nature Protocols* 7, 2144–2158 (2012).
54. Orel, R., & Randić, M. On characterizing proteomics maps by using weighted Voronoi maps. *Journal of Mathematical Chemistry* 50, 2689–2702 (2012).
55. Altschul, S.F., Gish, W., Miller, W., Myers, E.W., & Lipman, D.J. Basic local alignment search tool. *Journal of Molecular Biology* 215, 403–410 (1990).
56. Davis, J. J., Wattam, A. R., Aziz, R. K., Brettin, T., et al. The PATRIC Bioinformatics Resource Center: expanding data and analysis capabilities. *Nucleic Acids Research* 48, D606–D612 (2020).
57. Singh, R., Gaddnigo, J., White, D., Lipzen, A, martin, J., Schackwitz, W., Moriyama, E., & Blum, P. Complete Genome Sequence of an Evolved *Thermotoga maritima* Isolate. *Genome Announcements* 3, e00557–15 (2015).



58. Parks, D.H., Imelfort, M., Skennerton, C.T., Hugenholtz, P., & Tyson, G.W. CheckM: assessing the quality of microbial genomes recovered from isolates, single cells, and metagenomes. *Genome research* 25,1043–1055 (2015).
59. Seemann, T., 2014. Prokka: rapid prokaryotic genome annotation. *Bioinformatics* 30, 2068–2069 (2014).
60. Page, A. J., Cummins, C. A., Hunt, M., Wong, V. K., Reuter, S., Holden, M. T., Fookes, M., Falush, D., Keane, J. A., & Parkhill, J. Roary: rapid large-scale prokaryote pan genome analysis. *Bioinformatics* 31, 3691–3993 (2015).
61. Krogh, A., Larsson, B., von Heijne, G., & Sonnhammer, E. L. Predicting transmembrane protein topology with a hidden Markov model: application to complete genomes. *Journal of Molecular Biology* 19, 567–580 (2001).
62. Buchfink, B., Reuter, K., & Drost, H.-G. Sensitive protein alignments at tree-of-life scale using DIAMOND. *Nature Methods* 18, 266–268 (2021).
63. NCBI Resource Coordinators. Database resources of the National Center for Biotechnology Information. *Nucleic acids Research* 44, D7–D19 (2015).
64. Fu, L., Niu, B., Zhu, Z., Wu, S., & Li, W. CD-HIT: accelerated for clustering the next-generation sequencing data. *Bioinformatics* 28, 3150–3152 (2011).
65. Sievers, F., Wilm, A., Dineen, D., Gibson, T.J., Karplus, K., Li, W., Lopez, R., McWilliam, H., Remmert, M., Söding, J., Thompson, J. D., & Higgins, D. G. Fast, scalable generation of high-quality protein multiple sequence alignments using Clustal Omega. *Molecular Systematics Biology* 7, 539–539 (2011).
66. Nguyen, L.-T., Schmidt, H. A., von Haeseler, A., & Minh, B. Q. IQ-TREE: A fast and effective stochastic algorithm for estimating maximum likelihood phylogenies. *Molecular Biology and Evolution* 32, 268–274 (2015).
67. Kalyaanamoorthy, S., Minh, B. Q., Wong, T. K. F., von Haeseler, A., & Jermin, L. S. ModelFinder: Fast model selection for accurate phylogenetic estimates. *Nature Methods* 14, 587–589 (2017).
68. Letunic, I. & Bork, P. Interactive tree of life (iTOL) v3: an online tool for the display and annotation of phylogenetic and other trees. *Nucleic acids Research* 44, W242–5 (2016).
69. Altschul, S.F., Madden, T.L., Schäffer, A.A., Zhang, J., Zhang, Z., Miller, W. & Lipman, D.J. Gapped BLAST and PSI-BLAST: a new generation of protein database search programs. *Nucleic Acids Research* 25, 3389–3402 (1997).
70. Katoh, K., & Standley, D. M. MAFFT multiple sequence alignment software version 7: Improvements in performance and usability. *Molecular Biology and Evolution* 30, 772–780 (2013).
71. Waterhouse, A.M., Procter, J.B., Martin, D.M.A, Clamp, M. and Barton, G. J. (2009) Jalview Version 2 - a multiple sequence alignment editor and analysis workbench. *Bioinformatics* 25, 1189–1191
72. Kyte, J., & Doolittle. A simple method for displaying the hydropathic character of a protein. *Journal of Molecular Biology* 157, 105–132 (1982).
73. Schrödinger, L. & DeLano, W. PyMOL, (2020) Available at: <http://www.pymol.org/pymol>.
