# Supplementary material for: Disentangling the lipid divide: Identification of key enzymes for the biosynthesis of unusual Membrane-spanning and Ether lipids in Bacteria
Source: bioRxiv or medRxiv preprint supplement (doi:10.1101/2022.04.21.487849), 2022-04-21

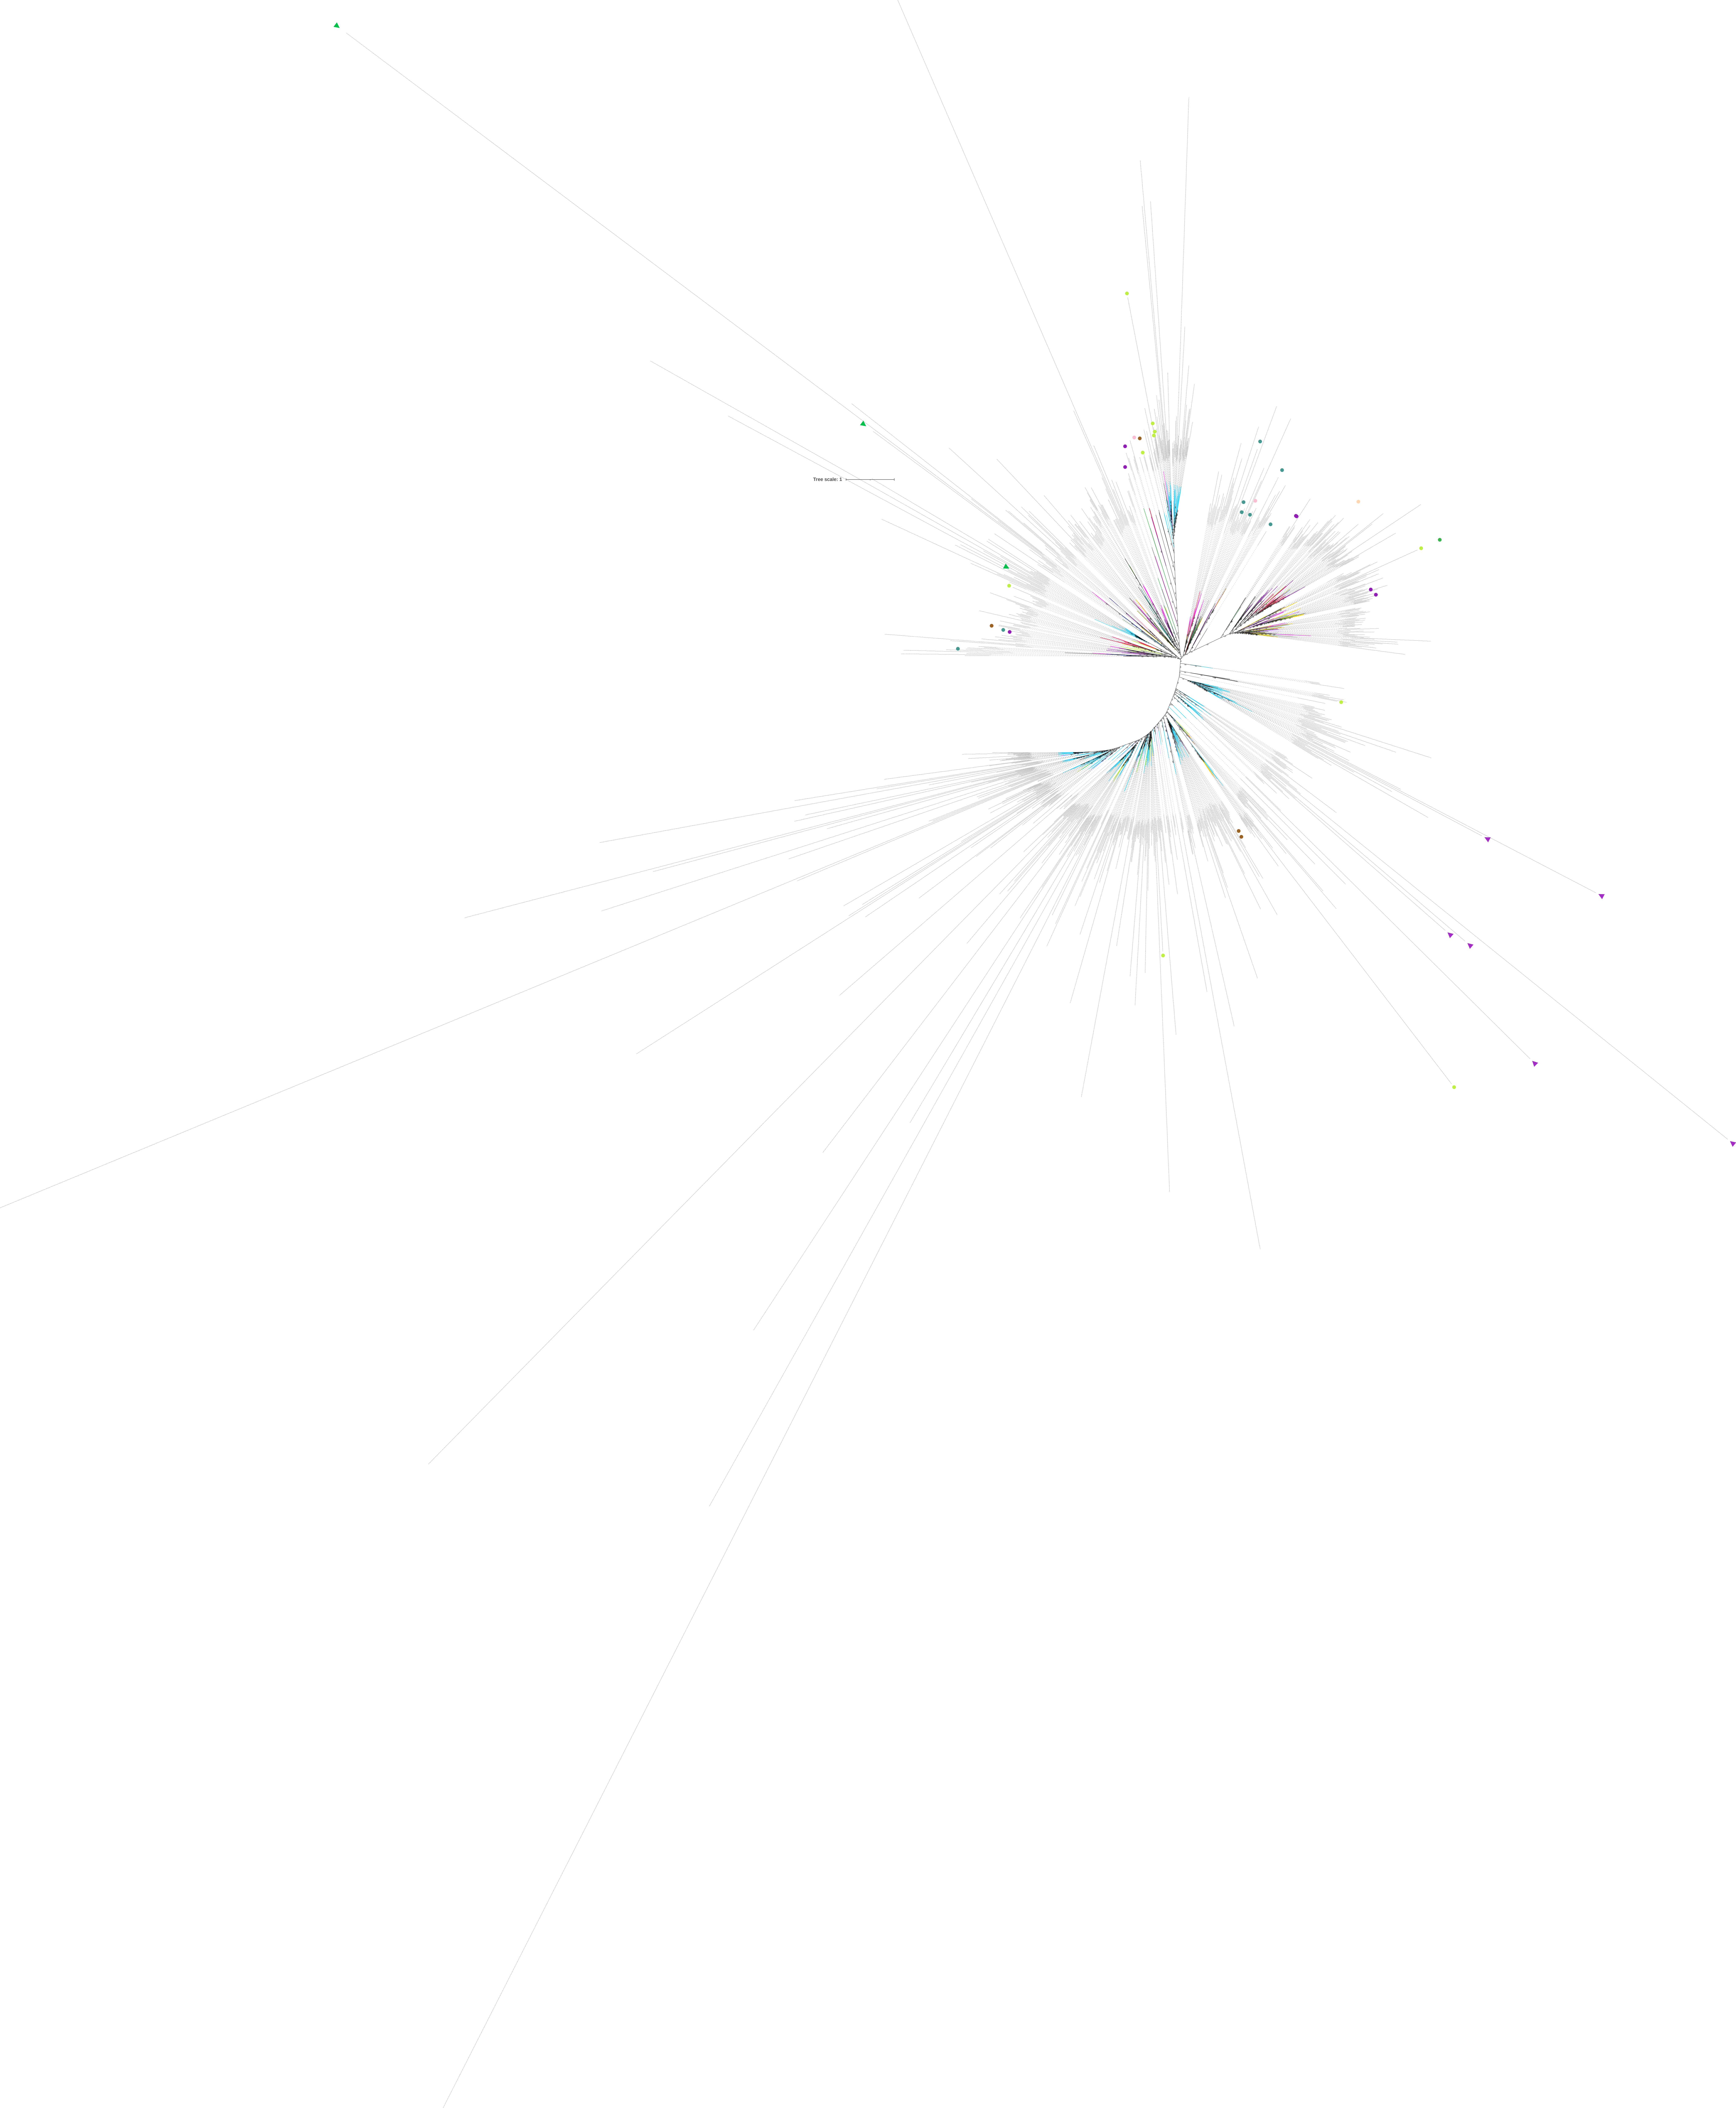

Supplement: Supplementary file [file media-3.pdf]
